# Supplementary material for: Factor instrumental variable quantile regression
Source: publisher site journal article supplement (doi:10.1515/snde-2013-0014), 2014-04-10
Supplement: Supplementary file 1 [file djia_p.xlsx]

## Sheet: 工作表1
10584
10572
10573.7
10606.9
10618.2
10664
10627.3
10680.8
10710.5
10609.6
10725.4
10603.1
10389.9
10173
10196.9
10194.3
10236.2
10120.5
10067.3
10185.5
10296.9
10270.5
10002.2
10012.2
9908.39
10058.6
10038.4
10144.2
10099.1
10268.8
10309.2
10392.9
10402.4
10383.4
10282.4
10374.2
10321
10325.3
10403.8
10406
10396.8
10444.1
10566.2
10552.5
10564.4
10567.3
10611.8
10624.7
10642.1
10686
10733.7
10779.2
10742
10785.9
10888.8
10836.1
10841.2
10850.4
10895.9
10907.4
10856.6
10927.1
10973.5
10970
10897.5
10927.1
10997.4
11006
11019.4
11123.1
11144.6
11018.7
11092
11117.1
11124.9
11134.3
11204.3
11205
10992
11045.3
11167.3
11008.6
11151.8
10926.8
10866.8
10520.3
10380.4
10785.1
10748.3
10896.9
10783
10620.2
10625.8
10511
10444.4
10068
10193.4
10066.6
10043.8
9974.45
10259
10136.6
10024
10249.5
10255.3
9931.97
9816.49
9939.98
9899.25
10172.5
10211.1
10190.9
10404.8
10409.5
10434.2
10450.6
10442.4
10293.5
10298.4
10152.8
10143.8
10138.5
9870.3
9774.02
9732.53
9686.48
9743.62
10018.3
10139
10198
10216.3
10363
10366.7
10359.3
10097.9
10154.4
10230
10120.5
10322.3
10424.6
10525.4
10537.7
10497.9
10467.2
10465.9
10674.4
10636.4
10680.4
10675
10653.6
10698.8
10644.2
10378.8
10320
10303.1
10302
10405.9
10415.5
10271.2
10213.6
10174.4
10040.5
10060.1
9985.81
10150.6
10009.7
10014.7
10269.5
10320.1
10447.9
10340.7
10387
10415.2
10462.8
10544.1
10526.5
10572.7
10594.8
10607.9
10753.6
10761
10739.3
10662.4
10860.3
10812
10858.1
10835.3
10788
10829.7
10751.3
10944.7
10967.6
10948.6
11006.5
11010.3
11020.4
11096.1
11094.6
11062.8
11143.7
10978.6
11108
11146.6
11132.6
11164
11169.5
11126.3
11114
11118.5
11124.6
11188.7
11215.1
11434.8
11444.1
11406.8
11346.8
11357
11283.1
11192.6
11202
11023.5
11007.9
11181.2
11203.5
11178.6
11036.4
11187.3
11091.9
11052.5
11006
11255.8
11362.4
11382.1
11362.2
11359.2
11372.5
11370.1
11410.3
11428.6
11476.5
11457.5
11499.2
11491.9
11478.1
11533.2
11559.5
11573.5
11555
11575.5
11585.4
11569.7
11577.5
11670.8
11691.2
11722.9
11697.3
11674.8
11637.5
11671.9
11755.4
11731.9
11787.4
11837.9
11825.3
11822.8
11871.8
11980.5
11977.2
11985.4
11989.8
11823.7
11891.9
12040.2
12042
12062.3
12092.1
12161.6
12233.1
12239.9
12229.3
12273.3
12268.2
12226.6
12288.2
12318.1
12391.2
12212.8
12105.8
12068.5
12130.5
12226.3
12058
12066.8
12258.2
12169.9
12090
12214.4
12213.1
11984.6
12044.4
11993.2
11855.4
11613.3
11774.6
11858.5
12036.5
12018.6
12086
12170.6
12220.6
12197.9
12279
12350.6
12319.7
12376.7
12400
12393.9
12426.8
12409.5
12380
12381.1
12263.6
12271
12285.1
12341.8
12201.6
12266.8
12453.5
12506
12479.9
12595.4
12691
12763.3
12810.5
12807.4
12807.5
12723.6
12584.2
12638.7
12684.7
12760.4
12630
12695.9
12595.8
12548.4
12479.6
12560.2
12605.3
12512
12381.3
12356.2
12394.7
12402.8
12441.6
12569.8
12290.1
12248.5
12151.3
12090
12070.8
12048.9
12124.4
11951.9
11953
12076.1
11897.3
11961.5
12004.4
12080.4
12190
12109.7
12050
11934.6
12043.6
12188.7
12261.4
12414.3
12582.8
12569.9
12626
12719.5
12657.2
12505.8
12446.9
12491.6
12437.1
12479.7
12385.2
12587.4
12571.9
12724.4
12681.2
12592.8
12501.3
12302.5
12240.1
12143.2
12132.5
11866.6
11896.4
11383.7
11444.6
10809.9
11239.8
10719.9
11143.3
11269
11482.9
11405.9
11410.2
10990.6
10817.6
10854.6
11176.8
11320.7
11149.8
11284.5
11539.2
11560
11613.5
11493.6
11240.3
11139.3
11414.9
11295.8
10992.1
11061.1
11105.9
11246.7
11433.2
11509.1
11401
11408.7
11124.8
10733.8
10771.5
11043.9
11190.7
11010.9
11154
10913.4
10655.3
10808.7
10940
11123.3
11103.1
11433.2
11416.3
11518.9
11478.1
11644.5
11397
11577
11504.6
11541.8
11808.8
11913.6
11706.6
11869
12208.5
12231.1
11955
11658
11836
12044.5
11983.2
12068.4
12170.2
11780.9
11893.9
12153.7
12079
12096.2
11905.6
11770.7
11796.2
11547.3
11493.7
11257.5
11231.6
11523
11555.6
12045.7
12020
12019.4
12097.8
12150.1
12196.4
11997.7
12184.3
12021.4
11954.9
11823.5
11868.8
11866.4
11766.3
12103.6
12107.7
12169.6
12294
12291.4
12151.4
12287
12217.6
