# Supplementary material for: Factor instrumental variable quantile regression
Source: publisher site journal article supplement (doi:10.1515/snde-2013-0014), 2014-04-10
Supplement: Supplementary file 2 [file djia_v.xlsx]

## Sheet: 工作表1
1797800
1885400
1860400
2173900
1727100
1820500
2560500
2028100
2013200
3629300
1921500
2032700
3042900
3236200
2153300
2173000
2621700
2400500
3169000
1984300
2371400
1989400
3042400
3083200
2162700
2362100
1786000
1944700
2965100
2349000
1932700
1853100
2417500
1584400
1907400
1814500
2425500
2821200
1737500
2171800
1832900
1657400
1842700
1717800
2198600
1865700
1500000
1661400
1605700
2274100
1941900
1532800
4341900
1572000
1891400
1955700
2003300
1754900
1367100
1488100
1970600
1595200
1394800
1599600
1870000
1589300
1506600
1539600
1839500
2239200
2037200
3739500
2148500
1751700
1888800
2147000
2073800
1919200
2634000
2367600
1943100
2551300
1780800
2421000
2188300
4598900
4287300
3133500
2239500
1966300
2014800
2565000
2219100
2463700
2663400
3603500
4382200
2114300
3169600
3160800
2647700
2437200
2219000
2008500
1768700
2566000
2229400
2596800
2226800
2217300
1878900
1779200
2031700
1657000
1810700
3380100
1651900
1757500
1951000
2444400
4345000
1641000
2905000
2350900
2628200
1995700
2610200
2195600
1922100
1348100
1314900
1790400
2085300
2100000
3350600
1769700
1944100
2039000
2022200
2000000
1788200
1805500
1620700
2021100
2081600
1676400
1648800
1733600
1396100
1548700
1663300
2034900
2193300
2210300
1516200
1460400
1913400
1685600
2277400
2511500
1730000
2236800
1838900
1763300
2077600
1504800
2554200
2057100
1499300
1686000
1490400
1667600
1635900
1403200
1907200
1924100
1674200
1703000
3672300
1571200
1867400
1685900
1568300
1792700
1439100
1671100
1588300
2145400
1618900
1603700
2162400
1634400
1419200
1522800
1148300
1551500
2249200
1961700
3192100
1902900
2476400
2201400
1780600
1045700
1681100
1590400
1670800
1562500
1896500
1501300
1503900
1775800
2346800
2116700
1439900
1619100
1641700
2966600
2176500
1556600
2545700
1602500
1717700
2194000
1528500
1928200
1382800
684000
1515300
2337700
2025200
2120900
1494400
1222400
1757200
1525100
1679700
1518200
1511900
1498600
1896700
1630400
3583000
1253600
1194200
1220400
1008400
768200
1141000
778000
768200
933300
2034200
1786300
1699900
1930800
1887200
1503400
1574400
1449600
1616600
2007700
2033900
1662500
1808000
2494800
1840000
1919500
1683200
1677700
2141700
2065800
1808900
1434400
1437100
1217800
1329600
1266500
1629100
2744400
1842900
1463500
1425800
1462700
1308600
2300400
2018600
2134900
1908600
1475400
1995600
1832400
1472700
1578400
1667000
1762000
1586100
1283600
1806600
1436700
1630000
2219300
2540700
1822600
3550500
1433900
1156600
1339400
1316100
1297900
1230700
1290300
1403400
1861400
1476000
1146600
1423400
1823500
1585900
1228200
1099500
1372600
1189500
1406700
2347100
1902200
1498700
2039000
1666300
1286600
1839800
1605500
1487600
3786200
1509600
1915100
1937200
1769500
1683200
1339400
1560000
2006800
2165100
1699400
1923100
1928300
1751200
1584700
1749800
1507200
1459200
1457500
1490700
1260300
2082900
1830200
1563700
1577400
1666000
1626100
1568700
1497000
1783100
1533700
1596200
1825000
1895000
3420100
1272500
1475700
1253300
2067600
2796600
1779200
1350500
1587200
1799800
1418700
1230000
1323300
1537400
1311500
1332500
1626400
1399700
1408100
2154200
1489500
1675500
1403400
1884100
1367600
1287600
1451400
1827700
1487100
2309100
1828200
2070600
1982200
3007600
4063100
4799800
4314100
3963000
3931900
2280300
1881200
1878000
1712800
3085200
3363700
2267200
2441300
2273800
2550500
2444100
1775400
1820900
2297400
1781100
1746600
2174200
1663200
1730400
2281700
1971600
1899800
1926000
1720800
4259000
1575800
1570600
2218600
3061700
2231400
2256200
2127000
1724100
1913400
2132000
2428700
2674400
2264400
1900300
1880800
1442700
1333600
1881300
1439900
1335700
1403600
2014100
1695800
1661000
2640000
1618700
1614500
1837300
2516400
1636200
1857900
2182900
1541400
1581700
1261500
1221100
1449500
1802000
1652500
1345200
1196100
145100
1662200
1698300
1812400
1709600
1485700
1522200
874800
2049500
1569500
2867900
1437000
1501100
1538300
1459200
1684400
1658800
1542500
1490500
1719100
1612400
1369300
3895200
1351700
1651800
1632500
1516100
804200
959800
840100
84100
966700
