# Supplementary material for: Factor instrumental variable quantile regression
Source: publisher site journal article supplement (doi:10.1515/snde-2013-0014), 2014-04-10
Supplement: Supplementary file 3 [file firm_v.xlsx]

## Sheet: 工作表1
25882122	6894230	6186988	180730502	7326579	59855189	10174209	5714710	13700385	67075000	13121298	12696823	6155385	47796650	9506168	35461360	7953272	6935274	5839235	3043663	13896591	38412030	52087601	9190873	29139366	3715991	6104078	15172858	20753690	27810617
49904795	10641158	8870928	209449389	5697197	45128409	10596029	8743085	10307697	64537438	15594862	13093427	6841586	52359435	10673445	41212402	37153223	11586514	7098999	2849186	14744731	49756862	43375154	8650214	35227207	5941860	5004889	22251526	15649178	30177788
46748844	8399374	8837491	205148662	4718749	35715784	11014848	7189598	10709499	55460935	8833171	11748032	5605290	40033157	13171478	27729350	40849818	9632736	10551872	5268578	15239807	58174732	41406571	9908709	37899728	10124459	4726859	35182866	12517828	35047253
38632513	8981628	14380744	320591236	5432913	31539814	9627734	5224892	8202059	185462335	12058163	10224524	5840569	54021474	10901593	44861570	18359885	6617265	7517657	4470031	11916589	50563485	39429578	8972508	33600552	4901549	4264324	23925420	10662697	27194133
33206105	7908186	7147227	220023697	6651511	39107635	5625080	5511212	7657457	115099213	15609743	10239966	4197105	48211471	7898475	33098694	10999921	14358067	6107296	3405793	10767653	51199295	30408458	8466961	27633500	3933079	4654756	19376676	11363188	24898823
75822293	7396085	5626870	168662864	21929968	35825708	11909513	5599436	11250423	76611962	23671524	10134553	5730378	51051178	7975603	31863101	11819672	14321664	6081550	2927038	9582497	68737948	32447689	14774753	25791546	3058441	5529998	20610661	13988339	30673992
155882052	12657572	5273875	223433205	13562104	35773390	12175138	6302521	14618223	64620029	23075917	12331370	8083354	69952668	10820620	47112739	19551933	11634803	7199321	3031713	10921674	65912598	41273509	13460916	26309382	5147283	4671957	13512659	15117022	31497532
58667125	10137203	4950400	192544326	8398954	43682905	10843309	5206693	9620530	65334162	15639097	11789048	6458302	71416054	13023748	39615016	18000032	7578879	8623216	3101995	25375355	51843074	59515592	16968509	42594669	3462346	4877064	16047874	13290652	24884989
32374845	8238665	3000398	142826212	6224295	52305470	6720987	4373335	9235595	57378502	13208155	16115150	7114221	151635006	7898921	37973566	10023651	6196257	7095599	2634101	22024396	63236467	47268332	9139454	42249420	2656210	3551212	21626050	13771933	18637842
33416405	13629859	5067225	195124077	9397469	51648026	13483162	6685056	13936359	74097509	23014034	13355203	8502020	198066779	20995075	69730454	25979509	13730986	9429546	3954951	20853879	79915548	76628800	15769266	64012852	4252417	5343245	43749243	19087933	29412385
34424338	9534275	5427829	181420418	8056496	37544064	8722513	5674720	9662088	60685751	14024148	11377238	13888899	82521241	15181945	41734690	53010285	7307603	8551573	4500308	19951814	46579171	78338476	11577895	33964887	3349383	3680613	22449112	14618529	26084157
35660511	11643646	5374069	288678712	6953707	42134201	8703757	6107445	13302792	64482911	13256312	13900616	15199357	65651594	13033001	39937596	29479147	9406295	6997029	3671177	20842694	54853587	79243878	11557708	39087661	3433308	3673173	28361546	13308519	34630318
69920869	16978726	5401938	551071771	13877109	54688232	12574186	9021641	15403550	99132640	18900887	18486313	9608596	73517531	14476348	137541419	29094259	13699812	11725226	4783159	25575574	73071146	77178728	14300031	40078094	5942700	5111225	22108688	16028682	39116333
84460155	26172310	4743517	369508227	14762588	70429806	13824932	8180072	14459398	162654054	16696934	20255578	10089135	116293723	14017113	106631808	28025167	11775804	15645893	4809076	17465057	101952853	61704930	17703177	38382637	6886256	5813947	22726272	19416031	39087304
44160756	17587806	3489914	262201864	9777305	51293108	9132164	7036608	11155795	75154505	11098546	13477316	5738920	73771297	10002346	56575701	23989881	8426583	6382645	3386524	15377811	63380473	49273999	11631216	29903460	4768048	4999387	19795541	12003255	29302803
43899793	15709915	4552136	212329085	15218907	55314942	10558244	10332492	11197240	78021955	13276343	15729832	7136040	65294666	15630239	52970013	33282429	7757500	9296877	3137981	19863632	66645876	43600556	13079372	34171815	8488923	4996356	35449419	15584915	34083870
55355678	12910227	14759507	258625556	34042216	51805879	13375636	7409270	16121731	76847645	12822236	18009299	8719447	74919262	14982388	66318994	24109218	10207336	8080776	5066850	17483400	63945251	54617724	15228505	58988573	4662345	7690664	32795057	13192047	35726238
53754455	14149825	8864612	232809834	15624407	63621564	12829359	7783575	17128825	79153351	19438745	26579723	9622829	76957864	17102107	65063877	21417751	10452974	8560954	6821600	13374175	117394296	50942387	26931270	52073068	4554924	5579133	33457763	16960864	37361341
42940625	14221460	8725977	175048707	13962798	73421160	15267472	10724234	14508358	81149522	22454268	23487417	11572087	96036508	17846617	53654499	15404434	11074109	7591260	4347174	16120872	193881071	56043437	17067583	38925112	4484775	7232057	25407106	24281225	40876717
40070024	9361348	5929599	159399997	7155419	54357937	11832418	7036291	10894198	56939158	17172050	15740702	7247513	50322511	10149577	37402867	16347343	7268086	8069408	3635003	9217316	85911303	39435188	12904522	36774304	4305883	4916678	17076889	11027318	37692803
50568541	11274239	7862734	171540578	7667988	54088546	12947529	8263923	10102153	115761949	19641052	17464039	5900187	61927401	13609213	46012619	22109612	8444207	7272295	4689975	15130957	54161504	67636519	17680714	31119897	5640113	6129221	16513529	11388907	34063219
36024140	10658677	5480578	130831420	6345489	79928343	14540891	4707255	15976392	70774817	19437217	11359627	4177881	45572386	9256261	37374521	27546611	7949701	13695267	3401220	17467208	61393249	114002764	11083449	22954152	3978746	4150985	33634604	17988850	24024662
44580522	12947318	7491244	252323852	11644128	126091185	15248359	9350750	13407624	110089181	19813291	21654043	9129568	90924504	18396735	57209984	58782247	10672188	10873470	5312556	25335347	77833259	94261230	14306590	32330767	6662457	5983103	26974227	21029997	33865720
43966554	13024107	9676028	297630097	15989519	99144590	17308874	9651586	11956466	143501625	20229345	19731245	8618019	88708724	16775031	75220801	53306911	14643453	14010935	5407974	22972311	80810692	90399933	14844303	50884628	6746318	7825787	23515740	15545878	42298668
39387106	9371936	4724664	208027025	8668847	69898127	11595547	5662456	10657017	70480040	26005327	17616488	5719189	62562699	10081649	58313208	20271375	8362409	6976828	4407493	10215770	52824971	55630348	11431721	27176412	5193701	5260361	16611504	10505924	30520190
44020769	10682919	8250844	251462814	15499019	60337011	13055824	7201912	14359089	97576780	18058149	17621970	6044566	69204529	11356334	45177325	24555231	15747769	10131419	4252508	17143288	59120242	70977165	11427096	34939325	5355306	5277448	23968299	10825020	36245594
33034496	8880287	4237065	175622043	8581640	50560205	11620685	6403701	24191843	68366872	14481639	13872973	5219260	56236001	10115778	39318832	19988222	9358703	6161389	2445186	16820418	47954796	59958492	9854584	26649963	4619385	4933051	15150473	9408393	21700420
34206475	9907905	4395736	141039349	16407424	42462358	11276384	7125444	12389346	66893744	14614170	12855398	5090596	58830085	8353558	33833776	21738709	13163563	7478989	5524898	14430710	65995513	54693325	10383345	27448343	4639251	5504100	15003437	11579594	23558918
46151013	10692564	5178568	162708071	13447622	56456077	13810309	9659767	12802612	76498568	15027609	15768458	8018236	91103832	12335802	38053774	74199214	12320433	6750002	5443846	17907333	81120393	50344842	16188214	34114209	5810313	7957397	14220256	17038367	30636963
37183397	10964637	4268659	205388337	7364195	46758805	14232346	8568151	9061763	69442720	13317156	14687685	6777265	69073667	10212335	46423075	54155550	9669672	7090121	3620048	20773994	51937298	63284611	13273019	25904158	5379825	6290951	11683220	15771181	30518369
26048128	9849497	4116171	261477352	8453408	48507156	8728002	6939992	9758088	60550467	21524374	23444394	5827357	47289721	9485408	34648663	24839413	8532286	5424089	3095120	11961247	45787942	58255079	14384373	19506412	4512749	5988692	13421278	15529132	21822005
27489753	6859123	4391778	241887411	6844474	41154303	9851040	6122817	8212258	47330152	16565303	23478883	5526976	42609683	8260536	31802327	20606750	8633884	4976120	2702371	12350070	42850025	57121395	17709512	27025253	4577578	4124802	11197127	29457632	22542352
28570967	9412543	7371049	216139777	8007613	38782047	13113521	7035090	12595507	65204675	18576219	16661065	6303078	40763149	14222229	40291509	15497252	9472325	5622582	3218067	12408367	44453034	50658579	10897949	34707219	5437223	5296087	18481297	15090572	24265449
23194832	7412970	6034004	173757327	6994824	31378701	8683344	5987801	7868136	44977725	16102090	12437623	3808077	38726077	9839614	43894297	27353365	6743741	4274900	3025376	17577527	36709050	58002199	9675300	31107603	4457681	3311292	13731215	12097112	20467488
35026761	9695912	6483760	210394635	10314323	36289256	11907673	6399476	10228540	63362326	35770125	12059850	4594376	62215210	12481367	52223670	27848293	7417749	7485645	3983151	15934787	52266344	47873501	11948501	28517261	6511888	4152372	14744286	14138110	33377187
36226279	6412242	3400361	191519601	5810076	33183888	8920907	6898644	12062095	56644967	22946026	15016102	4782000	51062973	8519276	44652152	22311918	7237043	7579688	3530652	17093639	43165875	67723892	12808717	28973318	6050503	4842440	12452986	10624152	21469956
39543695	8456458	5043170	287143926	9966144	37112486	11761048	8159234	10553784	63360461	15049216	12835332	5658776	48779919	10528841	46720149	22799215	31826883	8499955	4106273	17036845	48696059	53458218	10085552	29583531	5101382	5920516	15841622	13510073	25668706
24760088	6475422	4415909	343633379	6108486	30720858	8978769	8800626	13449768	60557193	13879485	11018256	4784139	47788150	9357723	67702302	26546979	31547872	8288430	3224373	13168317	40371386	59237098	10640841	29184348	7398529	3973110	12739093	15953097	20129626
31583912	9138125	5265630	170860134	8398415	41779920	7428010	7079950	8680911	62791296	14182410	14150815	4577715	51123077	9219352	34614126	13290587	19725298	6320241	2545132	11806377	43776302	45624901	7748571	24905966	4330160	3703238	16198320	12129735	18798603
32518807	9938410	4383103	182998495	6584292	51404889	9257843	7629690	14070649	52591416	15189479	15013092	6013437	59390515	9013921	33895120	13813715	12253068	6271660	3365547	12254196	93128918	64662303	8004002	33402586	3619511	5956243	17353338	14083621	24826046
33297628	8221988	4289350	154923183	8833775	50694827	8194176	6576080	10345466	83823846	13900942	11452972	6389967	49911635	9360393	27562516	13534254	13287272	6396071	2852222	12584932	48425142	109070805	8608214	20701346	3892883	4835538	13358115	11631120	22283615
29452447	8899247	7718659	157708988	6197797	40259540	9419812	6815605	23076369	47134428	13777665	8080065	6032228	62752195	8067183	25455171	11131348	14491656	5958183	2620209	11853476	42891184	56919092	8600247	28734108	3911533	5651723	13106304	11211800	21962272
40731094	10137416	8505541	172433824	6628046	57059964	8750141	6855360	19205754	65191040	18768977	15449833	6140472	45883337	10634035	34792716	12133428	12119260	8154660	3143556	9868885	56004184	64708492	10101048	27961458	4259691	4057324	18742203	11375086	26837900
32469207	7811812	5077225	127681768	4755205	116139613	6477206	7244547	13177691	53661177	11056140	12883702	6199570	35738904	33380465	28527782	7578526	9458168	11826193	3627851	12057036	39416546	48738047	11293283	24679939	3144949	4018468	16036212	7556638	20298964
33461743	6766281	7655839	167750257	7693041	160872759	8485311	6915228	11072868	83685338	15127696	10230516	7529306	83168049	8827242	37097718	14592408	11535640	7126830	4249733	14695704	50276467	54548741	7100840	43466521	5108928	5560467	20303392	12584699	29003049
32085781	7749548	10616531	222855992	6531417	69648077	14653089	7741444	9652890	67845422	10532579	11688536	6917273	58440446	8436581	40901619	13906658	10788392	6900215	3584553	19427873	44894183	56304554	9813248	23537339	5891196	4904085	18157912	12697801	24811506
26611918	7637531	7293133	145045868	6172381	37337832	7027865	4630625	11398970	64901125	15320786	9571383	7929001	53784993	9958724	30125052	8599706	14577113	4350525	4051272	15315642	35350641	49140801	10053430	21768716	4085787	4983932	10990851	10675420	19370504
28849535	9464811	5302767	171433375	9689136	31162205	7682066	6035228	9610444	112860246	14953710	11759107	5170094	39589535	8222961	31371963	8989659	11167284	6601633	2945813	16386250	31700365	85444591	8099045	17818191	4490576	5805586	11299194	10478088	23362673
23502512	7125695	7709023	120345471	7907428	36764406	8807582	7771029	8235895	117957947	12049057	10277920	4497917	34372074	7444698	29146777	9896836	11936941	5715101	2622341	17415856	37512952	43938429	7675284	20320270	4929591	5463095	12597093	24374692	22072769
30826995	5806018	7495255	107371453	7282047	53892358	9829290	5626015	8472894	228543791	13699403	11305994	6135031	123037495	8887955	28551391	11378563	11143824	5705583	4242139	18309022	36729759	53165129	8939403	17620104	4126236	5154484	12872444	18458501	35107351
84638429	8942060	6004213	134379714	7925556	32464540	10291943	7158794	7858392	160485938	14730617	14205129	6348995	77798435	8060649	32919579	15558081	13037158	4818776	3989680	12389354	50386598	56635923	10135391	18108336	5519057	4486294	24433632	12495115	38774380
48457572	5520955	7435270	123896748	7206798	27084149	9916195	14438173	8044625	88481084	17765642	14130382	4954336	54438358	11742117	26004926	10776880	11748540	6206665	4939677	12497333	43827653	50906854	8867365	17013026	4112949	3174683	11132497	9472592	25928430
44632664	10728947	17721932	178157491	9425480	55653509	16610027	12938238	16728959	114794459	22430601	20920251	10744286	77991080	23117598	37012460	16581535	21805384	10229984	6876132	30775680	81340590	113236547	17458067	35866527	13199040	9199053	19890558	17184075	45563121
31070551	9194387	9014285	113627326	7512713	31899532	9317895	13004027	11717579	64945023	11738711	15691109	5651866	47315513	8803799	23256701	8633717	9063665	7386441	3256630	15473856	37703824	71069526	9647924	24538549	3817692	5176803	12752978	9874095	21393094
28541241	8592062	4985372	131205421	14316690	48812645	8007658	10610438	7037962	107574968	11511334	9652404	5979198	64682213	9453881	33738670	28224962	9541315	8057691	4153039	12338280	42021810	73908301	11808187	18141521	3244258	4964021	14429385	9369255	24753455
35225290	7527327	7699920	270760602	11447993	35293967	8997582	13662439	12195190	124252121	11822205	15121443	6669246	54737018	9351174	36049475	17918706	8526593	6363689	3102478	12361767	33991684	74002931	11732091	20422815	3218148	4180806	15008123	8698851	19753545
42375533	8716124	5431155	315206852	11363117	35142299	10510373	11473904	32705819	97651021	12956509	16817524	7605394	52453639	10496759	45022542	14827980	8319324	5705548	4942499	13175642	73173924	48202702	8203360	24101833	4123621	3936206	13527105	9793123	21099495
32166476	6821601	4933688	220941286	7887298	37525558	10414510	12060296	22909751	84379209	12346213	14226297	5550705	45631214	9450324	39729266	17103013	8138383	5984018	3815323	13501617	55601819	54172741	10630725	18060451	3422675	4793739	12126921	9947257	30553372
23827314	5865432	9064111	152482424	6986497	30388546	8819151	8257163	12560665	83919946	8929396	10235401	4643165	34447911	7812812	30631812	10126710	6926796	6522554	3102592	11158229	33339822	48742497	8176636	20305059	2644697	3033921	14014287	9776427	26128213
24014676	5561293	4381292	144302023	6183257	32975933	6378886	6226922	17201746	53166218	8666564	10143164	3426538	37721626	8311541	30296645	9197638	6815741	5093440	8704528	9921077	34955771	41833362	6113599	52253854	3517496	2876091	44281292	6941570	17747351
23324515	6883008	5884589	114098560	6661317	54747025	9875589	8266816	10789476	59203641	10343069	12855733	4904711	45987528	11939078	39045327	8654013	11461001	5765742	4336635	12966368	63762156	59032243	8194089	36706609	3357022	3761566	21436154	9966853	22352436
31486773	6016227	4412086	95585541	7829847	56194345	7864270	6045537	14602935	45472343	9432449	10683956	4980425	45498107	10600562	23898029	9584032	7173347	5475663	2965767	10135237	74767563	69108537	10554858	20558937	3725292	3456279	17213942	11788075	19618713
31293083	7857037	9326414	107947831	6695710	34806021	8108553	5014738	10608093	55883788	11381328	9881371	4118784	34944013	8617518	21346131	10098775	9595806	4875549	2600732	10464525	34337271	68721498	8579720	23975475	4361957	4504993	17681249	10749564	20901638
42065133	7816750	5194801	160268773	6388982	31122012	6489922	7075993	12637701	54087310	9399668	9684561	3926409	47062772	8260051	28195002	10026363	8802006	3318247	3208475	12275150	47153086	77605553	11052215	21369786	6585367	3689592	21087490	9567168	19776841
31685633	9795035	6717177	233487230	6972955	43840982	9431318	8513148	9242151	60449689	11070080	12077055	5157358	62542399	9409314	28892584	8486219	12030349	6623698	4463429	18392090	58319352	84537999	14043463	31371683	5631689	5225365	27211357	12935272	24531475
24417947	10437986	3743018	164223862	5418001	38623382	6887092	7057791	9916274	60592452	13824952	9007097	6006833	40790504	8962530	28874919	7826856	9733382	7140985	3757682	12329489	63703759	52795507	8458889	36555218	4146916	3353261	29617257	11139666	24062961
56197655	6614159	3345780	135447358	6022909	34612882	9804546	4968079	21346089	54607074	13064605	7485554	5186516	45525671	6973140	22889010	11309803	10320814	5622629	2884869	10069557	54754857	44001496	9146643	39742455	3406369	2818259	19715159	12535319	21099708
57159290	7790690	3666172	128258089	11837386	28368034	9999974	6329594	10410802	71693176	12261274	8456152	3992268	49328807	8695893	24639356	5293234	8465234	4025214	2626066	10664553	37073879	49243343	9164351	22940169	3204828	3794748	18415035	11964081	18170587
100689565	10941187	5079284	113650767	7001609	42851363	7978410	6011800	10922397	92571708	30322485	8112032	6819183	122194354	12481503	27975494	10297328	7528958	5652709	4255906	11921665	41373174	66157939	11229390	38016140	3433717	4417243	19016761	12851193	19177177
35116865	14091443	3496649	246522753	5497599	44602166	7290780	8120891	9267754	81938514	24720615	12030963	8545857	159927904	10501810	72528437	9356017	6932560	6193765	3632099	19975443	68937792	95885404	7685547	27719603	3158800	3383875	41458949	14687295	18787245
30282688	9524937	2943682	240005587	7129579	47015565	9702410	7160514	9186814	103096165	17975656	14140151	6425299	110810036	8656869	45417028	15278400	10175440	4767127	4535497	20775494	52746147	59603813	11314974	28000522	3736525	3360733	27056594	17660248	16713395
52024268	18334333	8074579	588951474	10385998	68528424	12865181	7816641	12334296	172372628	28515402	15628314	9548498	102969686	15743707	121194372	11721477	17539673	7876494	5343086	20591750	88707502	75522235	12570601	31988437	6067654	7570183	24672139	19234021	33864722
37704961	10527655	4203068	358776894	7969389	43890768	9337217	7939541	9840403	78148086	17571708	10731134	11330724	71307515	14626286	72140499	10369075	13234665	7158221	3554163	12545833	64969348	65927013	9549422	33300355	4869192	5122233	17802741	11315560	25687205
23725553	8075190	4760025	200453413	7708584	47168757	11473004	7404707	16515195	57663166	14848551	12252123	15218473	65978869	11916328	39311379	9387868	16256669	7341761	5734906	10152196	52205193	56514230	11230766	34477320	4310932	4977841	14943786	9092704	22989538
32116299	7741863	12037005	202051954	6359395	42738021	9416321	5451921	9039653	58418619	19597332	11586498	7559715	73892949	13355707	46326028	14100666	9631540	10738034	4522891	37191197	55337898	68569905	9858465	44752363	3833078	10706257	22656652	11499212	21119838
25438141	12870550	9088834	219375296	8722084	44845750	9422113	6452640	10494552	73039596	21657102	12391930	6018690	73660975	19582484	63176293	11029367	10149608	7139661	4627654	38232054	84756492	69717928	8372892	32947271	4728996	8610341	24908414	10921245	21653624
24519190	17471057	5198190	145395328	9044877	39306183	9918041	6700986	7677095	57782204	21336842	9783822	6197282	56972148	11674840	32489174	11843793	10837933	5923672	3990528	41335970	126761737	98306106	8452509	28021040	5346404	4710891	24453944	16595907	24341369
21771498	11163211	4023895	160734395	20134283	35668011	9794753	11389201	9983116	65706727	22057495	12098248	5285484	57704011	9281305	42874831	9147908	8945971	6035859	6289885	26595385	63651991	83473071	9262393	17782472	6322769	3457258	16346601	14750713	18238106
48565599	11300050	6054842	259384851	14324100	57168585	13043284	13268323	10931887	109626722	20588690	14552702	10917160	78934124	11863002	66291927	10743143	13800129	8154698	11140438	19521899	68731615	91540161	12849909	33875068	6430214	6237354	24950778	19174977	36375853
32575301	9534657	5699477	195233313	8233028	54476828	12116260	12071050	10930846	85006136	19377935	16099040	7123602	109045771	12476924	48583612	10251176	12378157	7589371	5730552	16879431	64555701	60666375	13091676	34159613	6420705	6122576	26605004	14904711	33245055
26217588	12615208	5202084	177167766	7917403	41866466	12275666	12128872	10576780	70061347	16265780	19525586	5786888	59056087	7930052	36509503	11464684	8718714	7357314	5284102	18242785	52671781	67501849	27302352	25633617	4908003	4974299	14873798	13319908	47203518
29297585	14019491	5600981	231485002	9428779	41893791	13911371	9510175	11456311	112131994	15800787	15731934	6266689	81857676	14255463	54116362	12490164	9674770	6966532	5261981	15721757	63218834	51069351	15768837	33741178	5243008	5068410	21916675	16279335	43760978
45596920	7572341	5407679	150729020	7886110	44975100	11650662	6554202	10887476	60151466	12644463	11667943	4992019	55455290	15310437	31229654	11894713	8061741	5991714	4647674	12426488	43989918	71956432	9756506	27076464	4037773	4115551	14574871	12301065	30740153
55253352	10577629	6230700	183176675	12560823	52350974	16274613	10615871	13195624	94114195	25531095	19988404	8285174	90699718	14896219	48983699	14595368	11641364	7240877	5456327	32438990	82072229	120897377	11402528	31363918	6098676	5426599	34504972	18670871	31646485
41838924	15036038	5509124	194986497	11422937	49873950	13028902	9387829	17964631	106988743	24373753	14031539	6072714	96825916	13143647	43058932	14565377	11835188	9578086	4879914	21460364	66828462	99297359	11611820	33486397	4062744	6179354	16274422	16609823	30262125
59084206	22510297	13770212	464829941	19368603	97902783	21060404	12151817	25182474	182102072	31189980	37936389	13168897	160673327	24409651	78214315	20860385	23957975	16490345	9156791	30771341	128603660	119224239	28564229	67758732	9027022	9270248	39490931	24068006	57732050
72792288	30788678	8927346	388037234	15725635	95886944	21868041	12626636	22579927	165442438	28628542	38632123	10584740	139349044	20467817	72918163	34280651	21767704	15285467	8368900	26434837	173712743	106900300	23977020	51362302	7940963	10290048	36478780	28945091	69010820
38911878	16791923	8841784	268339196	11858883	74909759	14661760	9437477	18283315	138163070	21683651	23499196	8463814	112597582	18445337	66575589	21020007	17655682	10903286	6271591	23437417	86655768	81597229	16011464	40842772	6336317	7692201	25955021	27090287	38330959
37195038	12344396	6551080	188170415	7482206	53761352	12023007	9341587	19839197	83497525	26625830	17319054	6499773	102724055	10880162	50759941	12701798	11583444	6710060	4762197	24643534	63795184	53957391	12398555	32373241	4672138	5971817	23241070	19630010	29801909
31223252	9824611	6331552	179280039	7793053	66108806	9257782	10353722	25533211	67911892	19131586	17683358	16628987	83338649	11036716	47701127	10451948	12002670	5655456	3430953	19086237	47148262	53524564	11004794	29324816	5782052	5067183	19404065	13610883	25390811
45686842	10081232	3953696	135202543	6531193	143639914	10840361	6775791	15446343	64319114	20234302	15447149	10498058	62094400	12337121	35326711	11088651	9660524	5735400	3314763	14651543	45289698	67779721	11157655	22946292	3797416	5279170	13279420	12459468	26793246
40184038	27485434	7952907	212853999	9939773	82123634	13607726	7899144	16945117	83707871	22621282	25960819	9920417	83522256	12505046	60718401	16108508	12934069	9112269	4138399	21105039	63330764	62672416	14651577	37805602	6948448	6648659	23075084	18653215	38814916
38809560	15067633	4814936	181948934	11881237	72486028	14694127	6580012	15136931	78746091	33496096	16964223	8924321	64612993	10260964	56505953	13597068	8697381	7468012	3191737	15409482	46054296	98823461	14659192	29926248	6006883	5980540	20897515	16945756	31926715
39958299	18849234	8882491	215945096	9596360	59682763	15325097	8489221	17396015	79482960	49054811	21417305	9331825	76614811	18482671	61742170	15065591	10218745	6899486	5220285	18288420	52768205	73472966	15875479	37971014	4368669	6040528	21469540	32230231	34466270
45089962	15597100	9974312	260690704	18584444	62396275	10775430	8377406	18537023	134949569	27202165	32333870	8669840	89514924	18864700	64602120	14038299	10559816	7814365	6405123	21175785	61752528	82052889	15928633	30794128	5241797	8501536	23889608	20419291	36724988
59832161	19592922	10903961	301090068	22805485	97372620	17882510	13045101	26616860	154420971	29542608	33168669	13178048	106533127	24105867	76559136	26854679	14647050	13572817	8753123	24696713	87978085	112462294	23366714	41238627	7954398	10896262	29550777	27257048	57198898
43677092	18743052	10882625	266420277	15890166	88184825	15920108	12568679	20122971	146460802	36007629	27823580	12639577	111766236	21812957	89578978	17770626	17116971	12615218	6489607	25498491	117599629	102435158	23162458	54269300	8400558	10626713	34899717	24549160	52808963
22371301	10357946	6168525	170800581	11184653	48145756	10549689	6139071	14047620	74166942	24279148	18083718	6876074	56425593	14044440	49240776	14099752	8459414	6744342	3633377	13305813	73706705	54187822	12727036	30028362	5268113	5352565	19355985	13572402	27870607
48578017	14757814	6903135	263851835	13795480	64850877	22308518	10418559	26555900	122217979	30507879	22718387	9498873	96123582	21178808	66804704	29024455	14346895	9257929	5705171	20689229	98323659	102956592	18250819	52238217	6596081	7858347	23247255	24062657	50539012
34761625	13490655	7386008	225855540	11567996	72450992	16889903	10530044	25298682	83274463	25393332	21561184	9085436	85515854	18914535	50720994	13965771	16307144	11525723	4720928	26259032	176615452	92242547	17432660	37663591	6973293	6560490	28179865	19078845	34030729
25666568	14744286	7444591	163440744	9557684	59786322	15252885	12946131	16214711	70117996	16379207	17941237	7726260	83234278	29928382	44851107	14550386	11331800	9728101	4554877	30581165	136418962	66976471	14963855	27558600	6247089	5075368	17534263	13980529	31912643
21000900	12495365	5775552	160734273	7709405	56435136	14445694	6205633	15833122	70388018	17550180	19136976	7421873	72712220	26816496	41252340	10890468	11788668	7164730	6482710	24992737	67498821	61380974	13952198	30332001	5474574	4809540	18303624	14019582	32081193
23392915	12526151	6318443	126137354	8343828	56347264	13967715	6769046	15438724	73122758	17273689	17766995	7136082	57168457	19508448	37844369	13060714	12137358	5367669	4340122	20759994	76155153	56878518	15341647	29740918	4961082	5126815	14446316	16053600	32976183
26196311	16206601	4588144	127064452	9455113	45754500	15674207	5890683	18309285	62852716	14262246	24743266	7705256	61319402	15581767	39614798	13476131	9371053	5750390	5773551	16194626	65324772	49548599	12985147	25630019	5062731	4300789	17795716	13665737	28670754
25609181	8858457	3775793	124191828	8982766	49011211	14280074	6635488	17752439	51841058	15651527	16839002	6645219	54614871	14254125	30952859	13756479	11782152	4402406	7880860	13110090	67837972	34245479	10739799	23550378	3679206	3912195	15907873	10509388	32385188
30388786	13696854	8228615	148367965	10277448	60600445	18132735	8578502	21813072	114407889	20061610	18692614	9668611	67901173	21785399	52858862	11868992	11970629	7557728	8152774	18203963	89824807	77932526	17909644	36867106	6378262	6460148	21066509	24039643	45017314
28358767	11256563	5918374	158913005	8905905	50262202	12325059	8114027	14577144	73211717	20854206	15493158	6951325	65406839	13844130	44521257	11341679	10088827	9808776	5947701	14130990	80453754	68781579	13182795	37371728	5780403	8310661	16488500	19501212	28391157
27950294	11585938	7192623	167536889	11606176	71578512	16575034	11574764	15662434	89369322	16153698	19926265	8398976	91372389	14941480	51015647	13231752	11214858	13566952	7229428	15483473	87254017	63246241	15340359	41472691	5969582	7425615	20219345	20317205	48459091
26130751	12274818	7729414	150815899	9751378	47660184	14081548	10148842	13714135	66852201	15794234	19089313	7800209	58976922	13172984	42585019	11470809	8830985	8925976	4805436	12855953	87804800	86582400	14211515	33181234	6338036	8001560	18476355	16540496	31688497
22458033	11783453	5682835	124003436	9704516	98932896	13937282	8320131	13720176	78610524	15342948	15893586	7479510	57164001	16994121	44298818	11676941	9394957	6743449	6204474	18714596	78942331	60174780	14755932	33071173	4964591	5873363	16666488	15850405	33019432
18332384	7807147	8462175	115092688	7341745	56321671	8346366	6505547	8807528	70850780	13694619	11498051	5826993	49495598	14712854	31140960	6120782	7480599	5367611	4636176	18127221	68055919	75619435	19774157	23748370	3916255	4583547	16912580	14027340	21228425
17830449	8484864	6000064	120477496	9783561	57277295	11948403	6876930	9336756	75732154	20280285	14370824	6753113	68875779	10523926	48659629	8373839	6828149	4525397	3612002	13656281	50960603	51260892	10972707	24880546	4117978	6658892	15005097	13900030	24667771
22035532	10114797	6400775	129784702	11871524	77835987	11760265	6226695	11552301	79034666	19748912	15805227	6652612	62074987	11103431	45361663	9425024	8186045	6419994	3233220	21903215	81642173	50477737	11944920	20988918	4132619	4944958	19280301	14310768	24533120
16455188	11552198	4451695	110871729	10564554	73636612	10425200	7201453	9416200	86654923	16321556	18115799	6400971	43857015	8637467	37219389	7396712	8392310	4548420	5359715	17335673	48698248	37923622	14628794	19947836	4817581	4057650	19451239	15902646	20654028
23777065	8013270	3637256	127078064	10575463	52817877	11113839	6125855	10951054	57035239	23934857	16346201	5575129	37269996	11723066	34752390	10024190	10372183	7015318	3976314	17894951	47996892	49721219	12060092	23735700	4518058	4348939	21063622	12667232	23310911
21429272	9287436	6216603	105702860	11005311	52411373	13680125	9486177	14674180	59324118	19786013	18863846	9581487	64867977	16845436	37269667	12964490	14203889	8817872	5260718	19641961	52078257	69824355	17519111	40564616	8521721	6191329	18298505	25426629	32747742
63257386	12073585	4109588	109053172	11648655	54835376	9348839	6009213	11384016	71220011	16599633	12684731	6857800	48951002	12143507	33663250	7515346	9174146	5203430	4064357	15578666	54623218	45715790	9688891	16787986	3336200	4520392	12571263	14656776	24877930
31821545	9894721	4188173	108209424	8659736	42144644	10576513	6506653	9731963	64972142	22902233	13248310	6030623	58822696	13823770	42252261	15472400	10402489	5488184	3117437	16399845	55986286	43848607	13229501	25787663	3883321	4198041	14833798	13659223	26147747
31953108	9454079	6098515	132876542	9037550	54087568	14876649	5747526	9473961	97565136	24796308	12815896	6855741	61354530	12659442	45045988	12129193	10358976	5443143	3567090	13000522	61467532	48308030	13424424	25835015	4276036	5070851	18661794	15945812	38058917
25226307	9669316	7771633	167864035	8658229	58012308	14188303	7698246	10273460	96304901	28837408	15087723	5565558	62008910	18216217	73848340	7824674	8700697	5942906	4340004	16428921	85247396	86075179	12932603	27449575	4199952	5505738	15393664	14819550	34188932
28668474	23429653	13325593	175208867	12068739	76907552	20473234	9654548	11155628	134222204	43591469	24021666	10420571	94686503	45006827	70739502	19455898	28983797	8047682	4339806	33872947	156238262	58634251	44195557	51772784	7527874	7919437	20067370	45333508	118019341
19098666	8871210	5517259	110685296	6836814	43366434	10873855	6111897	7801989	60456933	15452071	13095950	6335035	54480696	15834242	39963596	12533542	11762670	4428300	3100487	13744988	73786479	44620448	14115411	21841604	3219535	3315722	13177559	14697130	43023177
32379179	12258480	9212175	201942246	13061811	68954337	16422324	7300456	15871908	114904917	22822698	22156077	9378599	78817460	20239927	56688245	12794585	11752643	8715915	8546153	22865616	119765991	64887912	17815208	52855100	5661692	7028682	46102721	20354463	52533187
34459000	8975437	7102283	138884346	9636191	57124532	12874756	7091484	17186331	81571622	20941068	23706870	8017939	64292006	15802090	35333556	17784433	10966876	7204843	6943601	21205491	81041413	50682891	17273635	37194699	4426230	6561249	27611745	18391498	43943455
32208610	8747392	6465274	256732405	11598307	66345465	16335847	9902993	19906185	107074386	27119514	21393274	9742108	88378621	17973429	56646919	9408354	13015316	10924381	6811700	25587163	92232449	67876514	19338630	51182842	4621091	5676823	30406311	18114602	47749705
15468004	6928090	3563089	140940028	7878228	46264574	9144760	6344143	15597260	78535356	15398827	16739952	6454413	58082533	10534720	36802729	6974242	8135200	5280890	3776808	16993407	62486452	40753235	12102879	23202653	2722377	3988754	25578108	13582354	32760420
29444317	10308506	5444112	120133078	9358400	51188436	15039926	12981419	15215422	77155294	18300108	17190453	6348708	60694840	15461192	35954058	10744489	9169055	5940905	4012653	14915953	73592710	71952071	13959223	35998869	3858645	5779958	39476136	18225757	36914869
21768725	12115853	4785046	149968514	7592990	70562238	15691722	6942702	14309482	91707819	21796163	18318298	7090291	71775145	17280181	44603161	10063465	11739914	6623297	4957837	16889159	81959053	54261493	15470088	31801523	4668136	5255661	20718972	16176501	41788019
21011864	11511890	4489385	132278412	6060571	55312336	13478820	7466727	10043989	88422839	15975750	13222116	5439663	65412227	15897272	41498700	8608440	10781255	7871133	3975745	15567107	50758674	59791313	14770538	23429725	3231484	3637897	19228525	12649961	40430599
21043253	8292771	3145076	86510550	6457836	41489558	11390404	6043776	8530805	46093326	13507480	12749596	3897964	52838733	12174104	30426775	6014634	6474062	4512986	2817343	11993313	53809048	32620344	9626736	19636590	3095880	2919556	18327063	11607233	25977489
38989194	6981175	2299533	92093217	4915588	30563037	7351943	7473648	10094258	38373377	14259336	10529660	4206871	56563132	10797127	24999339	5357851	5385242	5420731	3206584	12617572	49854151	38363006	8324447	17332693	3025759	3787152	20740827	13440871	23515226
58535502	8623016	6208160	130668654	10076509	45006517	13751275	6360683	8652919	57826956	22058071	14503780	6686660	102951487	10924303	48554656	7801997	6853193	6071953	5137399	12904041	61916869	50048482	10497103	26168953	5224181	5035837	22707956	13219735	30513790
25839225	7158045	3822487	115580533	6851129	61467722	11750417	4703208	7955062	45710272	13639104	13766268	6607133	198975378	9668481	37273623	6171108	6196265	4476027	3114488	11199063	72805622	45585555	13797093	21052206	3865943	3441277	18155647	10708279	26062278
23390899	9838162	8069172	177146171	8102464	51769466	10507546	5721331	10657281	79316266	13535848	11971209	6187523	118540913	12839210	81873525	6594585	7485022	5470109	4641963	10990840	56934631	43625815	10267156	37464270	7023769	4333851	18414933	12256670	24740581
28249049	14179024	7016315	438349418	8504059	77068373	12060647	8492362	13060062	125406216	21870705	13365846	7002854	80439555	17569836	58504779	12130091	9781682	5980918	4302449	16578974	65057510	47785755	14142401	33274699	5952666	4498616	21672126	15922014	35805131
26715732	7378122	5031293	314653219	6825210	54691611	8350562	3867647	9646907	49071020	17061140	10610841	8374970	63412188	10277477	35404011	5005102	5683651	5072617	3054127	10118494	38178508	32707777	9643520	18947492	2667196	4731681	14944636	11895933	20959768
28972646	7589521	5069055	180093368	9471554	66165807	8923811	6223545	11631999	67284171	23279307	15881368	16339914	72351273	22305296	43538736	8829904	9769478	5474283	3050754	14011680	45528902	47140625	10930033	24055753	3801211	5256354	21387182	16283881	23809373
25089239	9539165	4459407	203193830	11430176	45751258	9044937	5584166	10150960	65014910	17161244	17718792	8615430	72434905	25707128	41113720	7271154	18181930	5734312	4992504	12813417	73288136	42286086	14913544	28986807	3961686	6598645	20638599	12311094	26859671
25842641	10875243	7572801	185723174	15910540	57948474	9553454	7075039	9984455	64304019	26144596	17153261	6908946	74522632	17973186	35495570	6403934	10346042	6719269	7153793	15728203	72990421	44805945	13007275	47962639	6956492	5200479	22518511	11984441	27052368
25102652	15327764	5030308	133939500	8874563	39346035	8430818	5507852	10793100	112736925	18982292	18935780	5081874	62112487	15076578	28231909	7248875	8092493	12243606	4563297	15686504	108518024	53196474	8462162	32701121	7008577	4670040	47117514	13058090	19285225
26413835	9497736	5836365	159163016	8882583	38334718	6475821	7174241	10109366	80897161	16149399	16208701	5171970	50923958	11777269	27206673	6161111	6652826	5527981	4839776	9642097	67249364	55494525	7807672	26234847	4814359	4541178	15441919	14117130	20226275
24451211	10163697	5687098	176836708	11950150	47987843	8163468	15848103	7102960	69932832	14851193	16485949	4648527	53981235	16963932	44872583	7463008	8952709	6215140	4243864	12677259	60681686	60661347	12532484	26093880	6311969	4617411	22731310	12295289	22400863
18697171	6399826	5540629	110104784	7611561	41763317	7398294	9275800	6089132	52466811	13917885	11207844	4252231	51662551	13503670	23945038	7256566	6477372	6709740	2825607	9709564	69700881	40353003	7844999	33573611	4455058	3671068	31990066	9328948	23509308
14414237	7126819	4460227	124835850	7671492	37487927	13351994	7780198	9946709	69920035	15505875	17449042	8997318	83810623	13036741	29009062	10016545	9160190	5132422	3344587	14581926	69444388	58526117	15779270	32628926	6845008	5163334	24238561	9630970	33770097
22648398	7341750	6032163	130194723	7220263	42177234	16957766	5922303	7805184	60255385	14853137	12608148	6025737	67375642	12984935	26444762	6954515	8353433	5991031	4748387	21732429	83533627	44039186	11932293	25605043	5751937	4726336	19105723	13558844	29365843
25903404	9530383	5405901	130151324	6278816	42948833	11838154	9868995	9923978	67379038	17857302	12780454	6412625	50227341	11430777	35539013	7694621	16020784	5846522	3614174	12081804	54931706	54759285	11142838	35098885	4933008	3772071	25016147	13836111	28116269
28361252	7290371	3778718	96744604	5885912	27135780	11796244	4791395	8503206	55092439	11724659	9654245	5091953	60914450	10855082	29966937	7739871	7718784	4947223	2856548	14587865	56715063	159200342	24455267	24427499	4927026	3562271	18409885	10673587	31075733
21893936	15943966	3861191	131814840	6210316	48333801	8068822	9313595	9840099	46123106	10996672	15745673	4572974	85633278	10508781	23079436	10224178	5987164	4570203	2225144	13141491	78516796	73167532	19656204	26163659	6729806	2814012	17320721	8074928	21034106
15560408	12460826	4318815	110864417	7413383	30216444	9306538	6185187	8413275	46595650	9102766	13488775	4523103	44688036	9796671	19830561	15959186	7549803	5441783	2526715	10067266	64917837	73729881	12620946	23515947	1966235	3069366	13572211	7439982	19990513
17560918	8052655	4498788	134989346	5463349	40444580	8987717	7992636	8061671	58954760	11372854	29037639	6137550	50825588	8524039	34906770	15450079	9045243	6775485	2701265	11658747	55984489	51632136	12649701	26401367	3140762	3213541	13054672	8270290	23097593
14554424	5088530	2907790	121408265	3628977	64003003	7018820	4965807	7813114	39913402	8359116	200701794	6135341	46075374	6678211	37795086	7406158	9369012	8924710	3190898	10305490	57101407	48085599	11108288	22443065	2248301	2669869	15344209	8268873	14735089
26452450	8527858	4127296	131245479	6084174	59157133	8413897	8041373	12342046	53235314	13865695	73312153	5471688	136342060	13550537	34166133	7565146	7687915	5690124	3642924	11864633	87257083	57593123	13452712	26646081	5991557	4102901	14874372	8848397	23196153
33451735	10160197	5230837	182788020	9229080	71416500	10594471	7514469	15042714	77142196	11673844	57798645	6317883	99053891	11470182	46195284	9005275	12151210	5478735	4505643	12442490	76696877	53712481	12947037	29123328	6571963	4839817	18473301	11308509	24278625
19473933	8675999	3841704	146796856	7638970	227271678	8994615	6505644	11807430	58233580	9893604	52653263	5132391	86575765	8240896	35382450	7061496	9391353	5643020	3435745	9164380	70234947	48451600	11580805	30537787	5021296	2869292	30886688	12800959	16958713
15438416	6453339	3667547	107899671	6663236	67897781	7091487	4672318	11057828	41650239	9314718	29469300	4670419	57374094	8548972	24562738	4833291	7461019	5939548	2081530	8755618	45260530	32406290	8807766	23750344	5029144	2472935	14639261	10098308	14656220
14580587	7164546	3042334	99751109	5436242	88627502	7286251	3417619	6921276	56428377	12151200	22879754	4009130	48707311	8749525	28333832	5442387	6979179	4936519	2361917	6895156	40958292	36278400	13138719	19871928	3513336	2598421	14097070	9650242	14309345
22815286	8561595	4303899	132029359	5946552	82944625	7360425	6573724	9875193	60908101	22537884	23623651	4298456	60831246	13478845	33880047	13858745	9030211	7395493	4383007	10676969	52931923	50455247	10877700	27517124	4762571	6485282	17696666	16320145	20130065
19501271	8703275	2815959	137490694	4989145	72847936	8309148	3715911	8324967	42305006	13733135	22154069	4883200	56376755	10534905	27045943	10030396	8308373	6032049	3198889	9132768	45990092	49431430	10739213	29739153	3837781	4944548	13597367	15745605	20073503
26416217	9474654	4201568	153308132	9625389	71330097	8870643	5150501	12070685	82332994	14149246	25329326	5402347	159893070	11949610	35387240	9415753	9390634	6950471	3959268	11508863	54066985	53262117	9822652	26642466	4068737	6073210	17974297	15634007	21176264
16838634	7878451	3865920	164469153	8023289	54658699	9304138	4881510	8632689	65404415	12430385	38853796	6246279	95165804	11286110	30865893	9789006	9631582	5566205	4355383	12197526	49564332	49095516	12108302	35585671	4564000	3822360	17318099	11701665	21011235
17213730	5156582	3887794	114612158	8878559	49306357	9991530	11478937	8046484	55568016	11447297	37414453	4034393	71946060	8843786	29276601	6859211	7620087	5404340	3243451	9976535	51721950	58979592	8468428	33930880	3939081	3954942	20004401	14658521	21339487
22710836	7565370	9983697	156831249	9677689	74398733	11263769	6193128	14230914	89667387	16618323	30242745	5623839	75096510	14938364	48719465	14299624	12198605	5846423	4476958	11265418	66531558	50337709	13733302	34143825	3826575	5287455	18305306	16701622	25684287
18937869	6410238	5144544	159919949	8681784	54302686	9717226	7042808	14147763	76793219	14358651	26248626	5239579	62706852	11678528	36062911	10494759	7931516	6706540	3578835	10609840	47393352	49389645	10400942	38098926	3639162	6609165	23561692	14850712	20966742
21602999	6937927	4889669	137740406	7084901	53478833	8182701	5797583	10129630	58287111	12718435	18335295	7747797	69579643	12840926	31878901	8018538	7410717	5218706	3586034	8500924	49105276	42386257	10264958	25915879	3796384	5595152	13463341	11903867	22332580
24421003	7486493	6851673	158583984	7486827	62118737	8789449	7293269	11143925	46476745	12750893	37172173	6214197	135198223	11674881	38448740	11784322	9832742	6593150	3445848	9546062	60941493	38262498	10317328	21235394	4437606	5074526	12683288	11934910	28279461
21907636	5102811	3279135	127318280	5132926	58968920	7558827	4365139	7085809	36578890	9632703	29386902	3603963	73716263	9239909	27303090	7588038	5116372	4195098	2414277	6782145	45451935	35667545	7462632	15848185	2966402	3371036	10393088	8504360	16264629
21111358	8312829	5309421	172916958	6760676	94448449	9227407	6888834	12520619	59221293	12408175	30206961	5624125	111595675	14572496	34788405	9189269	9283819	5598167	4956046	16583653	66081795	44731723	12590088	32852637	4577073	5199372	21032710	25359385	26985521
24245833	7717266	5688698	204516778	9070930	80170044	10549379	8449543	10020801	78040449	12772481	22320565	5624070	73604180	11603373	36769747	10832543	12082693	6749452	4506967	13057605	65227534	45400139	14751765	28501804	4922250	5230906	23698756	13438318	26285671
31420107	11712440	3465719	154849470	5300527	59431027	5994324	4687085	7034534	54433054	14321146	17779711	5104238	53169319	8084487	31281882	9270208	7351046	5886571	2484374	11571510	48832588	36223049	10258127	17362510	3595832	3837365	11228851	11206276	18663659
16625968	10887663	3471392	141525960	7837379	54469373	7197605	6967330	8473357	64341094	12769651	18115194	5144355	59142335	7533329	34128023	7535087	7433809	7331244	2939611	11505100	64187731	33007771	8972538	23177386	3405604	4315904	20987345	9614484	21984387
18770888	9780450	2529793	127447169	6846728	60555741	5886005	4261432	10733014	55364767	8605862	20731941	4353927	58616509	5626433	31885417	4932449	7201307	7193707	3105595	25335067	51928118	39897363	7421687	18243702	2519097	3761085	13419640	10585108	19441282
25578738	9172141	3747053	102609949	6322971	40611445	6940644	4609661	8373558	75066461	9559675	32777677	4485988	101740654	8412485	30780324	5821016	9189353	6816178	2789471	22144708	65512029	55522945	7719891	15103208	3597550	3077321	14262840	8959334	17380593
25431208	7918375	4190271	168460153	5355814	43595482	6651412	4673052	6990562	60504795	7885453	17870684	3437312	65000669	14077425	33436546	7479217	9059190	14620708	2473188	11568102	46020331	52198501	7939055	27431828	2830216	2690756	17028376	7299637	16526781
15654548	7389062	3214672	85861621	5018591	48398737	8223613	3792082	7364303	46637635	7330874	22784902	4419379	68820603	8358704	21931499	3836033	9222722	7483857	2166265	11223085	58293390	42024742	7379062	19746937	2624898	3026373	11586974	8160457	14489442
24625004	8239560	3126886	164017721	7694231	62434718	8593085	5723136	8836147	56300141	9960914	33827078	5272370	73856057	10706403	41642138	6097788	9012950	7855750	2868223	10934844	114674605	47828719	9809320	19477232	2998717	4476920	14977833	7868150	23148237
20956080	9461255	6025175	139946043	6047640	109191555	8446745	6015600	7761798	48159510	14076403	40923838	4851069	64459113	9912623	42753815	6255186	10493019	6543926	3319833	12854929	87133453	51015546	11011617	20347300	4636109	3467647	12023594	11201697	17986360
18974105	7993039	4928182	134622674	5506769	60891898	7241014	5614792	7262226	68556302	9804228	24136051	4762454	56089104	9111441	25402031	10928249	8701187	4549325	2177335	11491216	56202876	55215492	9189692	19246172	8112270	3692647	15834068	10198031	18769862
28582577	7239792	4681838	120746302	6234221	47577640	6907789	4941280	7297803	47070316	9353414	23331051	4685278	69139007	10495433	25206063	9910454	8288758	5078358	2436434	9091809	44545575	38712976	7648552	21142478	5763603	2805921	16015235	10744312	16436215
22715672	29144012	10702625	132623770	11341385	54752205	12334432	8529202	19012707	72498408	13018286	35399626	10397559	70434829	12240505	45937293	8167050	9988896	7934397	5972925	16401685	70339518	53339364	17798098	31120984	7193266	5201211	21526912	20800076	26447341
18698310	11833226	4186997	130623485	8895651	55742483	7737398	6795768	10234914	46243361	11595001	22192243	7214702	44949941	11160735	33380287	7774956	7032006	4212163	3665878	10544895	49876115	31416701	9057522	28534271	4551270	2978666	21609782	9261251	21798289
33723267	9324814	5361146	168325477	14968077	69763233	8604543	6677359	11630296	54155152	13833417	25985427	5268405	69174620	9449122	33547311	8068119	7379008	5302489	3685215	12254718	52845876	43882740	11306669	30447196	3248729	4472402	20581261	9425447	20531407
44203692	10857939	3635438	140729472	8386055	49272150	6772748	5293617	9897671	47441048	11558432	21475948	4922426	61574736	9353295	34545978	9030387	7381989	5141559	2473002	12380298	94296150	52038754	9646489	30550150	4314055	3057385	17618220	9662167	18203475
39845841	8687796	3656836	153227091	8745860	36037634	6801973	4219583	18090891	53180114	16046931	22945723	3898794	51944873	8394685	33454235	12740675	6347954	5921729	1994061	10602677	46204095	37912599	10107355	23838501	4685345	3412947	15983151	7291174	18097972
30766434	10122957	4588640	142216233	14189208	54199349	8255978	5460871	10620932	84902939	11354944	24534679	7078166	55681723	12619077	28814892	15758957	6905933	5843364	3420475	11636437	51928813	33709637	10602707	26621836	3291337	2970796	18654017	9768322	25100506
26729874	9272593	2762402	123685102	8361887	48664702	8380668	3748546	7883960	40568976	7991397	23055567	6155412	51110519	7687577	25685877	6404627	5272222	5957362	2494696	11061760	43726859	27925100	10284052	31028171	4025637	3726622	19803090	8662188	16642792
30122819	6562051	3583121	124857168	7786777	64745774	7832083	5777108	12866444	53932394	12830303	26569336	7483822	61152700	12155438	31442541	7905133	9942008	7050285	2587365	12725699	56041120	43564328	11368802	27445721	3080480	3501393	19435962	11149152	18809447
18463619	7914379	5874289	156660781	7943513	46300290	8856628	7598692	9231186	44121558	9184515	31307300	5151624	62484014	9596735	40201878	7292565	7877665	4671238	2915919	9456722	44318896	42297697	9709339	27236273	3179069	2934795	16006136	9865603	21160380
21487759	12293288	8214220	148879821	11940734	56850332	10127511	8205826	14459401	59000836	11406904	28119296	6432029	75386074	12845593	54889094	11105710	7924788	7239133	3636228	13702430	61268914	39658770	13101681	28304114	3280267	5015223	15658666	10907562	25463604
22998046	10671991	4489476	168739893	8543634	42190694	9576074	6042458	12916223	48431857	8654597	62983124	5621197	41273531	9773174	38971702	8491238	8234182	7196116	3206788	11746182	62669041	35523023	10256245	22208802	3211353	4998673	14511764	8231451	24166728
31096687	38491794	4073665	133638418	6418653	31726906	7608293	4992231	10710319	45829557	10330650	22995953	4063858	67081258	8709965	38885369	6107402	5763122	3904074	2291747	9238008	98135329	40673603	11622044	26520875	2487548	4437123	19128068	7139044	16902026
30006458	68408249	7517108	191202183	7140291	59678053	11603369	7365299	14555361	62608107	15981320	30354662	6202496	60987537	12439344	42378617	7924664	10036702	5688255	4621828	10669182	78150902	44693945	11415463	28773387	3646025	5541106	20659854	10216524	25182332
28093287	21056432	4719126	150749306	6258321	52791304	8657280	5422012	11344117	73998647	9959949	25891699	4782906	54989197	11339709	31558859	6644464	7062665	4734967	4145212	7548233	50488873	35689918	7230708	49033790	2484008	3951974	39171741	10413703	21648685
41382486	18597265	5506142	112257378	8980269	37864247	7713908	7515199	9029755	58593526	13168013	18987538	6439518	51790598	9827939	26921226	5790393	7483684	4480996	3331607	13902711	50094684	38560450	23256960	31792112	2221892	3016777	22644460	7770280	19468715
72769454	13337624	3335682	173065636	14296553	37806062	6887312	7537940	12971672	51546319	10586661	18830020	4543943	46503074	7357039	28177279	10324243	8098899	4119724	2266629	8680748	41328771	28033777	30695041	24981760	2212666	3509179	15286229	8795526	22379098
23344152	10913426	3469356	101221372	4599315	28432233	4795146	4970242	5348694	52274723	8365789	12903039	4009558	52715837	6173369	24600038	4901604	6499122	3658413	2611419	5580936	27587247	22352444	7425409	14396828	1552573	2457049	11073452	7039421	13855232
35406536	19988930	4381517	136781609	10042590	35251845	8537587	7760693	9077890	64772186	12555942	14980861	5639174	94662333	8707304	38777416	8055326	8086956	4705921	2503188	11042843	50129494	45877280	24975297	24344583	3973831	3940460	23941335	15038247	20733232
34319623	19501877	6038876	174961489	8501408	66125936	11647763	6030679	14427944	60804397	15267191	24625264	8788326	172843443	10104633	69605805	6736494	12007785	4374143	3183841	9762086	75197238	49179611	9910046	20716718	4008618	4990824	22531519	13616554	22561242
26815588	14643237	3841826	510971570	5667720	38844207	6724954	5834320	7361030	57868784	11251275	14961230	5657693	59240084	8654231	76502097	7620957	7251389	6624056	2316552	9562022	51980803	35210647	8775219	17781961	3142132	4854625	17972723	15546478	17790924
40962860	14883650	5641988	600320864	6526953	50259795	9504970	6401031	9645748	205150163	12949669	23638755	7223211	64047727	13265028	142273454	7918138	9849350	6264505	3098126	15030372	68952366	39791776	9945512	35260915	3614922	4672760	31200253	12559758	25505400
18563478	10024804	4832596	417084103	6547794	40613507	7814079	10082686	6936915	67523000	10708651	18470550	10335272	55019647	10849232	55106856	10118355	9837253	5375910	2694830	10613029	48383591	42700550	11453591	15828445	3248587	3833462	17594851	9232360	22490553
28999844	18101399	4493692	574063406	9858147	53765868	9457716	6997779	9554477	74160124	12047108	20787164	14160546	85406183	17235434	70585824	7583550	17527193	5225997	3888219	10372440	66148915	48666759	12109071	31785565	3424311	5807792	20412281	10224905	25374241
30967262	9238687	8067660	655040223	9658421	44702233	8834478	6148832	10117283	69629839	18507897	18368086	6954731	84879598	10206703	43495023	7348890	16206043	6420277	2820634	9669282	56279555	42548226	10347471	22542428	3701676	8761728	15199035	9745618	20543715
24920258	12598168	4630931	318693838	17736225	38537219	9554344	6934030	16924618	59503640	22263109	19923619	6230393	74284484	11111650	38288399	7789795	11656438	7720214	5637773	10382218	50031779	76630158	9645035	31173909	3867019	8868475	31962849	9602147	21290995
18733381	17327256	3062453	173391965	6447073	23673166	5554719	4141830	9599013	31319037	9103510	10305705	4105312	50131981	6774719	24877883	6142578	4767348	4223957	2310722	6330538	25844141	82025153	5933316	18072449	3258382	3165089	23989760	5795437	13332895
20536912	13588441	4802975	327243246	6484663	37085289	6757362	7642741	11230485	53598650	8561234	13187144	4870012	45762689	7795426	37895468	10754049	10614103	4102987	3193069	10656702	50904954	67293963	8928504	17914916	4603109	4068860	15570600	7963247	16516899
21632201	12276030	3547112	232802778	6246068	37674466	5978105	11225279	14810368	49392679	9280727	14494309	7327698	56339405	7122806	39193632	8841832	7753094	4033075	2268816	7112907	69302325	35428094	12938417	21341344	5847358	3527362	13760117	10296935	17652860
24036423	15616899	3818068	275252207	6789815	39163777	9557233	7564129	11755587	50612821	11575095	18750077	6467113	48150765	11916024	30774505	6968439	9519130	8459064	3399735	12119113	64796956	45487459	13353443	24847522	4771429	3321696	18991609	13023898	23356538
16061886	14755979	4128092	180252266	7062871	33694256	8524158	6318952	14225936	44254006	7941210	15160795	5481844	71165582	10121551	30609568	7089288	8271808	5348770	16227628	9870227	80690192	34012476	9231809	21771200	3610280	3143980	15395914	8183976	20463114
39264586	9598191	3202225	126708248	4563895	44585032	12462665	5428358	12931174	38170815	9505251	18187411	8444096	60767744	9309827	19802113	6614660	7120138	4338964	6085607	15230222	114190391	40224907	11372240	21182542	3680633	2650141	12076517	8033129	19270397
18877277	8457255	3324632	151965525	7476255	49173606	12781488	5549398	8460007	52844202	8234570	12897812	5675536	51601940	9359903	36935650	9166328	9000588	4960521	4468410	9667453	61913783	41910246	11929284	25972575	4992310	3404618	12617553	8209322	22370252
17704559	9220287	6340401	176294627	4942330	37378727	9528709	5870408	16356027	50530957	15093142	11552220	4626496	60959783	8632040	39886281	9465549	6606684	3701348	3815166	9983511	54399466	69910493	8128909	18691505	3583303	2806232	12992279	8849413	26192106
21507842	11768299	4676661	176283959	5776651	53858845	10042207	6201926	12051270	65750254	9079315	22232490	5182447	53043828	9321808	35298248	12057382	7846199	4062873	4081973	9514412	110225625	50486313	8622079	19224917	3730487	3590320	13777338	9191329	26552538
28024501	13170081	5758303	310735789	13046573	55895840	16295659	6925454	16674825	87206662	11097431	21612033	6626305	66046242	11337319	77548668	12914967	13743446	5606904	6606049	11861097	93592793	58100470	11807437	22889151	4565228	5502503	14747351	13246900	31222571
32138944	13061783	3622796	405598950	6280450	41002934	14518368	7021462	9715178	69823236	10752299	15616227	4996176	55951520	9276460	75683281	20037424	8007768	5248036	3724724	22502561	110951943	57482964	9749649	18103857	4445526	4705619	13215574	10264447	26530570
22649694	7666106	4171524	247787366	4284058	40368573	11799290	4240340	6802546	47813766	9697921	15721043	4459904	52987273	8484502	32973223	9705365	5571085	4865687	5515214	13688143	71669771	37791351	7203054	15188177	3219096	3149708	10962756	9941900	23633905
29896378	9341075	4584835	224930081	6029765	51190567	13597135	6673268	7599927	49926676	10270052	15222105	5701284	46705570	9225484	32790141	13387903	8320412	4535198	4920453	21297923	58591588	46541295	8463160	19633959	4761973	3810636	15967375	10049179	33937166
24745307	9757253	10494604	191496197	5950185	115079913	11795357	6110754	7856866	49696256	11177454	13263964	5175737	48061534	10795327	35572492	10178627	9008516	4014020	3999522	19073942	52252438	53937353	8153140	21496442	4685487	4023929	13680488	11240577	25482316
21882077	5849506	10033232	130647953	5006572	552906875	11297197	6626190	37821107	46622887	9226294	24431295	4752261	69681361	9109405	25505905	8091444	8126787	4439197	5850757	14115368	62076010	44249210	7003881	21397791	4581731	3506304	12795066	12566064	23790350
27742501	7076943	16720876	170558001	6156636	234714817	10579260	5877852	39191864	48317955	10597127	18228165	4732937	100656859	12944728	33501732	8077777	10016798	4955315	4123781	23756272	64951009	40821461	9284549	26412669	4449514	4774244	12049770	10680331	24598037
18435752	6154617	10966775	112638350	15813520	137784808	9256421	5206579	11658317	39183291	9643223	14462792	3828051	50054793	12729324	28769862	8002363	11479973	3744857	3131245	13117960	51783327	36451827	10862429	23165213	4614795	4718564	14234942	11461234	18779416
32993827	11442582	9634789	219277605	12527456	212550192	12372159	9159470	12442320	74108724	25600731	22383671	6350394	62899103	15523971	45632850	10836733	11819329	6759903	5703666	22045862	65225310	43051309	14400403	25557852	7405147	6000692	19685214	23574245	27594423
16006148	9636987	8173227	169913516	5411385	112406905	7847972	5315472	10595687	36292648	19410699	28671998	4787048	44261136	7416362	32013963	6794789	8381062	5280968	3131180	20030542	58279029	37836430	7939224	24264676	5251354	3897638	13247734	14508343	17471797
28447759	8071356	11578601	138722095	6645352	102242482	7589932	6290787	9520355	50089407	26258231	19873835	4238874	68845233	9400028	30989882	8215996	20718246	11083279	3576326	15665620	59517615	29281622	11296673	19588963	3660889	3652548	12864024	11587413	18324765
17957187	7480759	8824612	104557397	5741132	100745086	8131384	6857575	13691959	49265371	25364494	20288314	5015957	49137210	12890023	26535210	8807940	20387415	10865942	3221217	15626041	52420732	32728493	9495782	19393616	4534128	4021960	13441226	10307649	24116323
17436938	7627110	5915725	222902368	6410404	65370774	6794543	7995108	6558795	65699384	23205661	33173628	3730686	40292038	11179126	33248287	7115780	16839828	10939452	2976216	14557165	53345213	32559790	9142312	19796172	4665943	3443297	12950155	9501766	18907472
23181742	10406795	6567822	199001094	5739157	91957792	9507654	6637171	11925883	55948535	11703086	51521762	4573145	44852968	14766218	35333462	7527069	8839102	5465308	3934636	18336995	69797110	39655627	10489591	18896931	4647260	4117306	13965543	13851771	22671133
14792763	6791300	6225832	109652241	5881345	63902792	8051142	5266547	9113310	42486515	9751512	27898647	4877219	42628940	9635857	24272837	5481834	8055423	4469754	3859050	10734879	56842593	23445503	8770331	17573997	3613012	3939838	14760836	10313227	19351014
5573213	2999912	2280773	54440942	2521505	26258169	2789661	3485807	3490898	17445694	4182129	9897432	2081260	19148966	4638810	12819133	3166389	4508605	2576957	1661261	7114598	21356527	16480091	3916474	7982650	1574728	1963880	6078298	4154989	7324730
21858672	10380829	4385199	144608301	5086979	51955802	9070899	6878408	8495129	56513537	11839114	20622055	5040206	46891755	12019300	30916307	10226070	11200487	4977533	3589925	13327503	56605748	39081204	8433850	24473122	5352668	4358748	14912236	10788102	20024288
16544409	9394913	5818879	266737689	7774673	63395473	10371097	7047276	17580955	53881195	12895072	23370472	7676120	52405083	12633463	33713883	9512123	11775442	5559110	3463696	38685472	75280894	43787199	17678966	25561050	7290758	5548223	16327773	17559629	27522936
21581322	15222735	7515183	288998131	8858342	79316539	10629159	8058383	15010841	68937843	17102221	20673341	6826974	52932709	15364681	33154035	8651792	10475791	5333181	5153681	33120743	74122555	44853275	11599218	23583435	6001597	7949323	14718375	17883267	26589976
43392601	10943357	4768256	284354948	6348861	113676497	10799451	6677590	13971811	80786607	25843341	16612703	5375523	48641764	10160313	41521020	10453130	11385179	4994926	4259664	37694890	91798522	33603412	7869159	22477821	6132834	4845508	19818011	15778298	21277922
25076439	9135676	3357297	164485865	4999457	89371040	6726806	13229975	6906875	50257619	16353806	17660220	3710884	43905874	9882724	30069022	7376558	10342821	3613865	2911458	10840270	52621910	41544756	8974165	22962695	3215056	3229203	12592186	10099205	19458666
18320564	6600023	3455003	132121866	4345425	78992232	5186216	6458556	5086284	58740747	9357227	11975405	3321951	31856832	8988972	25360084	7117704	11110998	3114042	3165513	10665464	36270677	53316908	5849483	23068026	2751802	2699012	20551337	8633172	15985840
32181647	9696254	4739511	214979865	11247524	74975281	12560350	8148567	8129218	96455315	12617980	22007082	4830430	46989113	9528277	40905775	9008187	9862423	7737178	10361733	18216139	57858797	62455319	9883138	24988612	3529827	4478449	20868690	15897298	23698478
27127777	8569759	5229994	234777339	5255523	53926828	6919210	5374484	8561857	47544846	11411409	12236469	4962115	68948069	7879147	38110535	10123429	9121397	9359250	5146773	8549699	41661226	42846976	8347941	17246692	3654791	5383956	11763961	12481300	22657782
13863239	7025993	5188492	328532560	3832926	91944670	8083441	9306709	6547191	39088092	15158629	16667000	4405811	79880521	12965760	43006669	7649309	9811136	10594226	3598152	8818029	47146826	31703106	8541118	20926851	3867844	3864123	19790851	10732719	17972040
13135277	8216038	5501849	224578725	3314143	64803088	7406667	5100865	6749287	125881929	11475746	16845419	3503780	52408741	11459226	28450214	8905109	8954632	5321178	4453235	12011913	37627809	42930634	11510727	26274407	3843869	3822881	19333405	12049946	17699487
16776067	8305907	4823758	189071983	6637043	62976664	9910328	6159911	12361682	67868699	12756533	25977418	4741876	78291928	13673554	35730051	6556585	9379204	6930687	4265210	18815104	47943655	47267089	8785193	23800638	4003487	3756457	19916349	11328689	21172270
16113158	5772973	6304424	161305315	4948635	57031804	7333969	7764281	6955660	76359364	11139680	14152282	4803872	42052809	13491176	34008728	9021509	13968392	6043056	2873438	16472715	64094854	52218908	8626318	26581928	3653252	3550095	17817841	10746202	20627826
16715636	7354807	3439085	160458844	8322746	57935420	7610465	5819636	7263554	70755305	13972792	13307723	4447397	42699529	11535547	30257846	8877380	13062471	6125704	4760391	15236135	69626645	38727672	11074403	34816801	3424706	3970986	16598027	10550111	20978646
26482846	15393638	5169047	309220278	4863640	61237194	7796952	5223847	7649735	53918686	11193308	22671597	4178564	35219852	11149081	37118142	7204387	14414024	6483607	2670589	9999491	57674531	35772427	14337389	17246424	2777420	3049541	16609740	12335253	18515746
21474579	17299987	8884612	154481415	6472637	115517749	10832756	7966108	11285382	65248489	17797146	24232672	10026946	57130096	15960923	52002241	11701526	14647055	9006458	3657173	18735063	87456444	52121307	23534507	36211342	4938704	5391211	24680360	21562172	36758419
21601070	31614936	9710920	113841341	3523194	49110339	8044571	4457572	5113721	40546415	8970457	15422663	3994963	34206963	8906984	22977642	9979676	9135679	4759102	4002506	10721443	52809740	39689598	10615915	27606440	2917190	2802470	12686628	13615555	16045718
21790252	10308425	5092590	163102561	4110261	62370576	5965909	5300304	4793198	41834286	7004467	15002846	3779240	34093737	7908144	30757752	7235924	9365605	4290391	3266770	9959526	38145266	50562644	8197114	16692502	2886232	2836574	13634137	8294052	21773576
22309532	7719773	5255958	240396811	2611768	42780233	4262787	2865712	7229038	42979124	6448036	14701890	3388801	49208725	8850055	47284542	5854509	7709854	3518083	2396791	8629076	42252763	35647890	7083331	16869550	2240552	2123578	10480168	11459853	14609193
29629307	4832099	3331188	184185633	2206599	41608544	5102381	2431753	4513022	30979335	6241470	8502344	2425301	27975338	7250206	18932006	4491844	6540332	2865771	1890335	7245698	24913722	21721132	5953258	12697307	1609165	1862679	10426340	9066273	11391629
13438052	4484952	2548501	115952797	2620732	62048151	3138302	1797768	3518871	33319494	5111062	6553935	2314687	18605059	5163689	17205495	4520657	4961825	2613744	1585444	4339738	21654580	19752090	7195784	11649359	1662294	1388783	8188119	5876190	9757211
13099694	4021225	2643380	119239222	2995498	57269449	5067219	2711386	3469995	47714300	4083981	10405323	2700968	21170561	6354168	20383628	4900008	4934235	2963548	1769915	5421901	23045817	29945475	4649441	13677451	1853084	2066986	11906433	6789615	14424071
17029162	3253583	2505431	74961592	2779642	32951171	5302915	3710685	5105777	34567473	6128407	8650320	3662539	20847049	4975397	13636982	5259549	4377888	3585041	1666804	5008610	19504585	23733455	4918744	12238474	1392794	1559370	14302875	7631792	11797971
14185330	4374354	2342863	88141919	2325486	25580605	4157317	2237145	3411767	28897712	6563294	6774221	3039004	18876406	5770255	12902820	4033167	4642848	2565107	1502884	5113685	20788242	29847565	3819864	12909389	1318996	1504311	9477428	6303763	10790477
14349696	3463998	2137376	63058408	2542626	28701455	5152868	2362400	3650797	27075590	5411316	7473404	2969833	15745708	4981307	12202493	3398820	5386675	2485028	1791416	5492972	24789284	23838066	5245509	15225892	1905869	1782248	12139898	7093892	15273710
41698379	7625579	8074867	354047199	5232501	54305217	7802301	5528270	7591231	52826345	7464612	19372424	4604911	58200433	14896247	43280894	8525761	9472723	8021106	2632781	19559809	53449410	32347411	10003963	20583534	2672147	3059709	20104499	14298462	23323952
75572411	14068019	7979820	218916465	6120129	46268058	8518023	5520742	21969784	79016057	14360478	19420376	5060088	75209333	12346673	40034774	11578237	13970800	36476755	2644054	13926131	54408355	42053506	11333175	20792113	2643959	3658989	22670368	12154524	20036742
48302474	10655073	5889933	246041119	4124327	69375865	6659696	5435747	22003369	51317028	11486234	19748856	4659195	61801381	11837836	50028960	10458497	17195205	17907936	4081543	14520002	58997139	64870994	7459852	28144658	2847854	2820689	33913093	14218074	16550798
37693617	6353121	7504373	241584573	4108865	65838335	6225725	6130227	14745131	39636338	11529173	19205886	5032270	116664610	7606806	31614151	7661436	10864232	11717322	3453076	11999390	88025000	116833122	11585907	40768950	3359288	3486345	35698698	15590074	22526881
36294324	6391190	6804606	392210313	4548061	67737111	6350153	5043703	6603706	57336477	11736053	22271113	4136379	74804182	11085009	69576907	6747839	8298452	11273141	3355467	12753530	73760179	130697424	11939975	47538172	8486867	2772109	29511196	7969195	19299008
59249129	5467997	4407094	185329616	4160919	40671497	6854364	12534099	8772618	62982605	9825519	12975052	3633350	51443668	9774960	30096879	5462785	7453847	11341953	3475188	10726416	57565395	112448990	12255881	41341192	4212917	3301579	38488924	10479403	20766530
72408720	5924121	4446521	212138557	5307161	38348449	7838691	10049351	6499970	46582810	12416595	24987160	4164771	64446980	7372768	28054428	6619107	7757716	8660525	3025865	10238683	50308014	32584136	9627013	57333540	3224613	3475012	43338133	12029975	15805517
42123875	8155158	5935714	203905170	5699326	40636046	7845401	6553382	9586817	61216423	8963295	14379933	4091442	53371353	8313016	44301341	6225970	7111528	10378564	2732857	12889494	52635499	27429361	10150506	36030336	4050045	3242125	24860240	13554121	17363567
69088240	6362937	4044835	159154138	4539829	35028703	5721856	5410043	7084008	44803804	10713041	13119541	3445785	104461861	9489675	42163153	6647224	8973739	14512583	2351899	74301724	67081318	45896636	9899073	35909892	3333056	2694405	23898114	12865956	20438372
41010213	10657129	4558410	282443708	4572974	35173928	5563372	4502440	5214792	42232716	13844170	15343951	4546699	154874418	11274671	86967637	6005374	6320957	10571327	2094220	41748757	62688885	30093735	10948680	34192520	3797952	4632643	22159385	9286738	23478852
34187703	8069679	9631511	198304258	8818403	46666360	7733316	5926266	7891937	70502206	10765661	14756892	9172139	55267988	13945093	46234029	11693452	8171930	11228741	2323974	58975416	53328946	31302003	12396293	31216736	2613210	3794700	42114098	10534371	23883232
36035563	14419581	8593621	246904456	6475976	53554027	6066907	6302110	8379601	82174191	9114158	16519458	12143445	43333929	9596665	44982118	8481255	9169111	10699743	2302202	29755306	50003780	38184875	11767081	31645069	2631077	4114511	24532093	9895616	21841204
40235805	7588346	6919050	245135192	7160597	53291321	6515717	7233108	8983532	67720730	13482989	21533071	7441447	56170546	11523475	46977165	10412882	10297655	8294436	2167996	21615459	58621831	50437085	12495002	29698167	2945955	3942452	17574635	19617805	29120514
27954609	8745529	4448399	291790099	6193033	40168231	7433741	6149107	10931762	229066983	11886912	29810564	7009010	63688252	12934647	44765036	10612666	8361490	9827662	3911376	20783316	58057992	39739157	9554286	38021753	5440806	4616171	24068151	12960133	25088237
41616735	9238013	5503636	225333816	4614791	44066274	7286380	8876505	7795408	98539769	8885310	16950456	7286272	82368442	11381700	27826581	12116828	7531617	16393877	6321634	19638686	52053141	62805692	10570953	19987917	5520018	4742375	15932452	11075619	24872146
32929905	16088839	5184380	303573509	5437213	72724141	7424582	10080296	7923795	100967784	14228176	17668031	8262242	72333719	28056616	36014891	9324140	9098604	6964629	7480949	32607059	42436532	70361994	11064443	27638389	7037702	4495490	43394328	20483060	21634363
29272752	8081719	13110799	145690336	6087339	65523570	8840207	10312505	9777070	67740203	16973087	14404159	5353895	57190098	20266690	25635750	10968026	6828552	6669956	4097853	26170100	74627560	54406085	9503440	24380559	4409719	5314122	24413721	13212743	25554908
19180461	8072187	5752015	153017976	11541704	36824565	6302235	7203759	8235402	67817153	10721900	14394086	4879977	58058289	11223695	26739397	11891455	6760596	7617097	3282353	15481283	146892641	42780836	23975023	58405006	4170404	4449930	19652871	10175482	17007675
28340586	9940151	5376313	226392873	7242824	46521667	12446680	8956288	8399967	102177416	12588370	20649346	6725608	55169259	15298905	38599629	11356856	11921140	9083709	4927554	16152541	141251258	46798984	14927396	41041845	5457778	4563581	20717945	14598108	26302721
28791647	9931128	4559711	117874242	6012012	40386431	11167849	7964008	8206393	51716210	11189503	21410297	7197100	90841109	19056202	23572712	10801488	7858881	6372349	4116491	14156825	65028438	42035013	12568324	29253234	6753670	4292697	14490606	15688491	34513877
55750762	11408734	4781802	211906582	7555908	40515001	9951807	7933023	9282981	68294925	9635933	14490551	5834162	60966606	14780437	28252044	6914368	8013960	8473200	3995188	21406311	62808935	134505591	14630632	26397104	4065286	3524691	16353866	12852698	40832125
26193961	6848967	4254074	140270249	6531202	41283568	6610592	5077864	15374714	42267022	7782337	11741495	3904892	46944832	9994273	24104599	5524346	7798825	5842531	2892511	13798855	45831488	73146961	11626181	23402674	8861294	2759465	11711217	14048432	18177743
25297293	5200823	5093883	145816945	5035599	53999106	10506212	4664674	9515214	41177455	5671036	15619054	4685095	39845281	10084786	23319155	4926790	6499026	11126660	1982901	40243897	60335361	65468863	8546692	21084098	4597328	2277814	18235775	11285636	19652158
18285216	6111628	4080079	140752703	6030677	60124838	10528209	5429808	11141084	43106682	7565849	11214027	3755814	39351455	9725931	38169304	6597367	4692334	9704709	1973857	25266291	40416227	43660141	9829710	18325640	3216883	2834362	12097769	7106393	16559987
26140408	9387138	4159276	149330606	5697770	52381874	10259488	8662074	7283170	45384360	7054335	17391739	4932599	43645346	8219861	36790334	10195729	6006498	11620486	2621662	14487458	68976871	40718229	12851094	32892635	3784437	3573499	13812786	6721899	15307921
20072538	9824497	4089156	158360742	5045323	73136847	5710774	7836735	11839305	54937383	6137327	9899760	5615348	48214063	7867877	28647647	9267081	6533462	11859538	2709539	11874755	34907677	25233605	8193801	19827343	2885966	2576476	11872727	8821835	17471476
25041178	8711893	4566257	150122558	4803878	125161052	8251754	6661133	35804601	61049527	6816285	19301363	4635303	44599836	8541852	33490064	6392167	14997305	5847032	4786503	14152281	52901943	34086497	11022080	18641522	5340740	3089397	14880746	8583856	15899703
21585639	9216107	4916926	132132064	5637313	559970614	7289450	6821988	14829732	50205416	6009501	23146947	5737706	56657935	8636022	22687507	16281718	9180670	5437125	2787469	10836477	76669729	38974905	10980678	35275582	4193433	4426406	21797676	15766811	21049455
21831331	6606863	4077796	156156432	6445306	189302231	7325857	7172245	14205655	40655163	10061952	14348814	5185697	43716265	9631213	40814116	23772913	9549973	4598430	3410002	10686411	83933459	41898648	8951956	22252220	3334951	2975370	16061755	9582909	16000975
23192833	5271165	4092314	112479607	4058353	109298459	7002959	5325363	7500544	43398448	9075374	11991641	4131438	45133325	8132255	28699124	11068742	6067463	4513332	3418920	12422620	56761422	35712780	7096249	22889948	4049652	2787506	17737848	16282045	33106351
20004330	5536531	4388197	109490996	4422576	90306557	7626839	6963422	12069136	39609956	6538350	12570793	3768703	50644219	8572904	35975233	7831263	8144759	3822952	2971859	16951934	44117521	37279861	11784997	23654739	3447279	2818032	20038853	11330695	25686175
19881554	7012861	4462268	132768178	4857282	101495447	6789795	7238007	7902718	38998779	6807039	15005830	3219806	55214046	9426078	44325110	12013603	6498167	4059145	3906440	14089121	70816767	37429146	9852792	22802406	3594578	2999431	17811252	15404366	16671924
16931901	10742809	3046369	103448799	2993575	89077580	6616834	8179018	6395904	36659210	8198225	9831036	3231071	50185645	7140724	22934172	7257537	9225793	4338411	3134112	10954190	57209558	42730301	7364599	18895689	3016260	3317701	13325991	8538952	17854314
22869065	12469374	5358705	98315728	8746190	90019681	8860412	8159550	15918368	45486073	12901270	13533312	4245059	55062403	12393022	23851734	7860720	12326923	5446813	3435166	17030428	68669215	40542373	9093680	19718796	5585226	3808791	16520902	19976366	22839583
46192658	9230989	5561369	187418905	8245938	74937385	15725417	8716199	14162937	72503746	20605677	30755435	5210118	64486509	11050589	44557244	14453871	8975427	7034606	5032395	17760190	60864748	61967863	9437638	25982275	5504451	4174195	14428569	28701561	32582219
39421644	9903506	5553517	196343789	8915277	89168821	17173382	10307578	18834769	84937472	15126878	96702639	6001475	83642301	12100835	36264769	18316192	9101444	7034435	5361408	16776760	60228348	43151280	11717337	24767376	5714184	5237180	15026185	20125349	38623408
28432414	10578145	6997719	201566332	6350223	71857766	16471958	9692505	14510574	65328171	9348507	56818497	5709035	54496328	11768919	31926179	9436890	8533579	7304473	3996068	13949742	64497405	40808425	15218598	28142871	5932937	3532590	16814759	23538727	28577392
18890685	9940740	8126768	126820385	4631774	49204157	8523958	4474034	9458083	45690656	9731086	26784826	4522003	53473652	11866055	26782116	8255268	5721125	6505999	2859485	8973678	53001013	31149572	11375006	16065688	3697727	2607218	11400394	20329915	22230609
21712307	9021710	4102271	136975953	4021732	62252110	10219181	6006975	12565544	42660840	9737353	27700023	4773936	66389673	20032134	25984336	9317861	9690956	11329671	4797334	16678928	51379675	49856858	11565803	21224665	3679860	3209872	18195357	17910523	24689893
29799518	8849194	5186446	161179183	7284877	61963893	12270452	7887164	12094384	62004838	10015544	19563292	4383043	57990505	14035900	33684117	8171700	15542749	9068232	4009080	22153959	60050256	51840994	12137423	22222441	4021378	4013388	17734262	17646143	23003146
20186337	7159525	7070247	115537807	5419944	63367901	8335969	6209263	7624807	49113491	12677464	14628033	3413127	52192242	10264568	28601807	6818049	10387946	7837607	2809598	12424921	48652573	46470060	10021130	26877094	3626744	3865990	16263821	11147654	17424538
19153534	7576563	5457873	139483199	7433864	57025959	7541059	6857717	9679666	46221775	8060492	21081735	4065346	50502793	7803156	23045025	11585779	14509793	7393817	3064574	37962315	68254426	58824299	14195863	21877232	4627516	4090201	14455017	12518806	17153926
18617384	6374315	5707148	146270877	5683517	57443645	9854675	5997149	11132183	61183923	9272359	27748202	4913066	64669379	11439484	27742862	19317763	11534543	5418160	2772620	38805989	70434004	51068627	11880841	26538523	4328672	3987773	13436102	15734594	20040407
21357327	7631985	5133765	139075929	6004801	70846412	8226019	5830730	11770177	66452945	8895479	17798817	5317365	57599757	9605472	28121927	12240245	11819687	7955378	3792165	38571798	64987131	45802489	11306420	23886049	3945056	3853417	10091401	13034697	18072705
19621975	10816736	5663929	250406334	6167138	54959361	8916367	5452111	6871394	50343607	14266354	15675677	5392122	57159126	8886859	32945592	8476529	10365552	8955945	3624359	11553499	50554017	37706573	10959409	30105390	3442616	3458999	14347851	11924628	17672775
20259675	5808185	5381980	148374226	6401108	53195918	7104085	4446584	5388356	49736107	9343889	15269170	9088892	60490811	10086377	25179169	5947739	7428380	5339165	2118433	13623672	39790204	29178154	8784537	28819083	2153560	3807184	10368945	11384000	13309969
30254543	6928972	5511190	155702631	11861139	63966002	12572914	5914012	10239107	80845569	8917395	19910661	7052811	69146564	14858294	33826997	8647537	8970757	8162914	5102325	15341563	66556302	42853212	12116092	34508760	3641449	6699218	14552110	18318675	26059206
22810322	6424340	3865232	111683296	8175263	68274468	6874983	5448376	6960354	56288093	7732467	16482319	4271868	45640763	10451597	20375460	6528826	6007665	4450262	3513711	12311334	49921849	40126709	9590839	21880656	2798190	4185678	16845650	14542710	17616543
17844352	6210471	4380408	112185250	7990071	45168383	7358417	8278338	11011551	91251679	8731653	17476380	4304155	48959007	11788560	24522310	6796592	8904600	7990241	3558396	13799215	54474558	169514745	9140418	25304326	3455316	3729198	23423329	10221618	16395167
30365133	7584206	6253202	170438392	11761514	97018052	12665807	6961537	14591027	133594930	8912146	22245079	6485154	80640884	16060658	35703063	10160391	12740706	6956239	5277635	16201456	76048951	79462925	13110291	38727337	5342321	5732095	27360995	13864391	23206849
32643993	10418836	9631416	178814336	13054147	93482255	14807208	10836844	16770713	132140354	14010126	25799361	12203967	84851697	17014954	42019805	11428636	16013575	10591629	6395769	23168573	100708376	70065093	16392561	37196132	5991631	6166333	21359705	16458018	33436926
24421107	7701262	4412390	131729397	9867283	83323579	9986671	5487662	9386611	83575301	9731695	26618142	7378767	59049546	12459599	46749631	12841914	10070224	6134074	3583709	13718591	62504657	59017516	10652577	26089041	4169705	4545671	31249707	10888179	21954285
25050744	9781186	5063064	199027926	11500341	125153791	11372995	8212724	13274977	79921799	11327328	28934984	11438536	73975787	14383533	77395294	10574519	11813046	9188062	4828373	19493523	85473681	79868387	16996531	26517814	5873237	6059201	20804631	11778105	28924803
18675299	5323375	5298771	114355885	7692116	57415001	8788020	5210145	7131475	53032450	7705463	14426601	5784527	43386432	10693773	28994175	14986132	6276811	5354620	3576928	15265324	46893959	47637355	9602755	62007386	2549673	3261092	27024559	8723465	18211783
13478387	6754268	4728887	86381215	7017741	63927133	8014667	4602973	6892685	46575405	6511467	14356113	4312353	45973051	10157961	19772355	6302749	4217791	4500251	2067467	16495854	30901941	45950998	7783605	28984740	3842863	4561532	16948838	8435794	16228230
26595856	6121973	5334554	230541437	7098285	52149443	6812528	5794014	11706294	44266216	8502044	15194270	4783305	37926680	9901520	26695003	7490137	6483170	5058531	3978431	12315299	44015832	34469844	7998760	21846450	3071963	3930560	13838141	13532050	15396456
21269522	6436121	4361482	170877227	8364792	57800708	7003190	3995194	7017792	43968133	10032707	18581313	5149381	49448240	8672330	21762328	6075238	6685213	4309880	2596984	11489749	38724161	49503139	8201472	32628655	2417303	3259665	10970476	15075477	17021251
15518041	6162195	4699751	115271140	7660768	53219832	8985665	4861842	7948125	40087475	7615853	15530611	5351426	52478351	8084807	20728753	7125143	6214449	4654159	2750593	10568656	57029788	38435291	7764563	23664462	2244919	4019880	10849344	7617691	16504164
19397166	5354052	3858494	78601705	5446912	63375719	6024573	4355223	6026052	35456645	8592763	11375646	3973330	37111485	8384615	19046218	6953252	5803314	3081829	2414605	9062655	48973880	28556314	8382346	50493897	3093216	3556736	19192431	8356927	14611528
18990781	5013398	4784479	117717076	5775669	57190828	6969165	3662282	5459721	36043710	18376790	26130987	3460430	59541547	9285938	17908774	8766750	5786147	3010121	2222234	9930804	40771523	33834043	7688374	42040320	2864953	3435742	23035147	8712925	16288734
23596687	5545162	3877633	121060988	5618757	60247467	7909636	6341831	7012495	46978263	7728475	17368968	3396852	54566408	10749320	26849500	6584794	9419845	3481812	3567170	17256436	41999397	38555955	7559888	52858393	3963243	2442593	25608333	8566268	15778336
16397456	5998244	4199652	86244314	5171880	64993821	8418662	5164053	7209824	40947774	8919495	15972390	3861568	87531352	9680850	23355102	10202593	8877514	4505905	3205931	12622918	63239989	41072180	11570519	116660109	3537802	3573623	14255273	10915511	15329562
24897908	5883325	3869760	95031890	6093586	62694205	6498684	3814164	8417152	48432057	9255089	19217637	4388206	82607481	9915912	25395261	6250640	9370071	3895712	3547233	11460813	63112471	28066932	8251212	122005918	3149523	3301530	14663379	7967500	15557751
13605964	4364320	3699819	71095179	3885567	57619932	4766018	4114989	6848647	45417960	6576431	21851117	3226474	69362313	9421856	15707479	5562079	6742876	3286652	1962849	11522616	35440267	42420555	6440482	37655851	2593611	2084225	11427466	9225499	13099650
30595258	5797794	5229534	65754450	5351735	103508195	6544828	5277244	7641656	41613096	10107047	16155460	3616188	62619753	10603662	21197863	6705217	6244845	4277723	2305954	9255141	73692868	32180287	9118051	29192585	2581759	2416518	13114605	8873315	17139955
26506665	8121353	4804410	136129306	5718855	176788658	6895106	3479035	7827883	50881317	10078435	19694308	3776524	56268575	10012202	31209799	6036789	7055139	5659227	2499136	13045479	65589197	45166877	8251507	25157948	2819088	2012811	13408992	8366141	13343275
29138050	7494801	4379028	119205519	8412546	119253753	7017539	4082716	9461465	52154758	10406504	16702657	3670064	51605192	9243587	29986534	8167214	6376401	5419500	3439683	12584622	46132602	44112709	7704711	30020608	2363601	2590366	15152654	12181219	16031392
29357306	5336273	3104783	87692324	5401154	82709100	6734552	2731151	7274907	48537317	9853016	13266089	3325958	46445758	7859302	23817971	7842836	5604595	3694700	2464598	18391164	39889629	35274691	7277321	26176055	1949105	2586872	9324882	9736088	15950918
43560704	5780651	2694958	63322425	5006279	56418741	6601403	3557523	6885108	29309893	7039073	12808910	4141248	43166948	9848034	25641610	8596033	7332698	3943675	3221707	11184926	34279911	37491868	7650811	22798170	3668921	2419535	11903445	7470045	13036786
81342222	5964775	3444077	100545161	8747947	65871488	12814851	5676819	8390193	48789543	8547017	13185158	3862467	52153961	9223552	27262641	9805703	8310183	4771973	3912566	14589259	36936166	44108932	11423564	21972958	2977292	3337309	9621000	13449628	20765728
40290652	5541468	5082925	124566945	5840935	60941577	7246820	4244805	5967021	40050620	10343383	12715814	4185329	38967748	10514570	55389228	10544089	4251779	4867200	2838631	7825231	38144216	29875642	10428915	21193109	2382784	3749134	8764251	8603945	14495605
29939400	4965585	4092711	115587546	5776753	58278551	7086581	4286668	11206420	44004705	6609890	16919385	4701587	52826058	10441417	45280291	21323558	11953461	3488936	2290819	15023150	55245529	48683678	10028634	19430066	3068311	3048091	13804590	7429323	15722482
17784343	6838161	4177618	266234840	5320192	82659584	8871650	6293758	8371968	50146614	10443701	14690960	5290777	44278371	18614109	32483684	21315152	8759594	4607431	3111787	36910280	65079183	49478557	12380993	22685302	3362443	4463551	11300155	8720750	17033856
35257195	7028920	6228799	262141276	11448323	86542020	7199177	5251467	9983339	63659460	8257580	18540167	6164069	46483120	20042944	51972676	14212648	8056989	4939950	3642975	17795759	58046281	46499820	11334769	21528107	3589989	5493134	12301240	9513427	15118991
23771881	7587140	4353471	182590262	7157267	76480010	4995765	4166506	6907863	63532204	7027738	13507747	6586249	81223687	26099893	26719904	9922671	5354876	4816218	2435097	15197714	38888363	33034083	9292389	23778093	3250400	3410862	10483756	6151988	12782249
26204715	8333453	6365139	180240830	5330266	86238184	6678300	6117979	7420841	55674195	8905210	14215637	10900602	174690620	26763292	35577420	9293921	6419405	7969121	3640779	14262232	61629857	64833753	8860175	31292129	3295341	7955651	14969929	7418076	15476280
23800337	11852458	3164099	100940001	4061111	56998296	4937575	5972015	4872047	121684159	8419331	9527483	6171786	77633090	11697638	24385721	7082711	5488837	9433491	2931209	15835240	46890792	139005130	10616245	25593926	4966149	5854557	30023512	5873017	12812939
15575308	5015431	2524915	112547435	3708846	42740859	3997319	4783757	5157785	55812276	8597721	13927333	3584142	81800487	7228457	17372619	7283385	5356354	3831686	2187675	9673859	33522957	45333452	7372567	13259404	3370314	3502843	10295208	5815348	9855214
18294777	5479916	5101489	146778636	6674453	81835170	5331585	5248011	7291376	52535003	14120604	21273146	7267276	105457262	14544268	25892676	6327700	16360309	4856222	8005772	21543988	69214019	37043940	9575969	21004272	4092703	6046730	14889257	11992708	17913160
18432161	4901135	7463019	118939283	6072091	97746718	6003221	4551839	5420431	88428707	12633750	13124851	5302799	68517464	23783692	20860235	8406754	8436769	5757259	3776849	20394902	52736501	46028293	9909472	28502357	3124367	3478186	18164343	9726093	17794124
17835664	8522275	7360367	92384111	6267811	52915981	5944103	7314036	6532016	42119320	9731297	19633474	5089916	54944403	13095488	19860955	10125070	7043180	3992567	3598414	13453983	80139010	34501967	13368927	24058155	2942022	4132508	11630147	9826234	18711206
20690374	8551207	8050416	87156335	11798961	137440979	6755827	5457761	5740911	41506645	15948723	14448133	5588010	156186137	12103921	23362495	10420900	7412082	4496504	3086601	18934931	319313123	43513954	13366028	25542357	2517376	3642512	13427188	9814692	17354828
27382003	8952824	5635900	89948580	7625755	46823752	6553717	4886494	5606792	36147889	7919220	14268908	5397651	71974768	15462657	25911666	7823006	6259468	4021853	3026864	18393789	89829065	38191865	8911533	27594052	2924559	3783664	13416774	8178524	18652135
75029723	8810194	4729968	145554936	6302668	56871015	7962372	4741580	6210424	40073974	8834586	14878045	5009193	110493542	13107192	30038819	8231893	5273791	4448385	2939183	17724305	71902991	108870016	9926242	46249577	2838311	3579221	33219375	11127281	18421876
52916347	8264545	5738502	99347158	8970510	58180134	8895329	6419543	7484468	57938399	11324343	15381565	6894585	137095418	13421378	22739271	9117471	6774148	5495987	3229952	17411683	73289470	50764778	14255890	26235496	3117106	4473004	11270787	8169454	22880094
42503268	9300012	4721112	131219787	8785377	67927573	11992754	5944873	8256411	57313699	13666701	12909615	7338370	94295943	14936241	26165414	17251621	7110251	6411855	4161920	16492867	55626179	42382931	10822553	31501458	3072183	4940526	15298319	11138624	27514728
27190594	8669649	4569364	111338663	7992919	60469023	9543770	5504347	7811791	43737884	10694589	12841573	4839438	100008957	11920578	26355360	16570742	8529904	6081738	3672175	12787020	55993542	33960984	11139361	24449811	2383730	5021109	11075739	8054644	26335304
20525407	6295870	3137617	110883176	5076692	46985751	7119668	4416102	6311268	38204473	6550489	9335665	3595528	73368606	9006137	22594923	10670011	4442953	6285197	2039894	10734140	38721056	31069423	8719843	15381951	2395085	2585151	8455060	6563981	18265002
17813164	6509951	3854429	91573125	4918931	68850552	6432293	4287755	12281663	37961031	6815796	9007222	4924569	66346529	9705458	22541436	6600225	5549314	4373214	3286903	9599932	120803712	33425459	8088536	17220384	3000609	2662503	10288381	8759291	17691164
26996189	6510573	3854565	150789279	9673000	129062443	10185132	6272013	38473400	38521784	9598537	16965394	4665303	85759530	19994847	31570951	8152500	5610615	4306635	3458978	11894905	78602669	43182911	9195886	20348198	2116973	4179709	11450890	9429201	24199130
21912443	7901433	3710234	112317930	9278457	238484032	10439475	5277080	13098298	38389347	9755882	14187576	5142809	66275454	15665459	29606929	9422731	8552254	6401797	3958181	15957383	77366752	36065107	11133591	22053275	2803277	3810474	10237000	8956495	21872186
24363052	8198068	3809897	159400482	9252889	80238767	8968443	6944363	8422193	42217364	8669113	14085226	5168995	53104755	11707031	32902176	12782306	8008670	5222494	2920635	11520237	66816790	36765280	12606896	17719972	4072474	3411485	10439742	8968618	17642318
17881777	7250763	3801072	123762477	8291602	81618091	6760296	6749259	11703988	45807006	11605654	18308632	4662973	74481218	11514178	34956203	8792245	6186029	6245577	2606756	18746666	91372654	45864600	9882817	32204537	2381820	3363412	10999422	14178783	16440293
38069936	7721408	5201927	145680968	19228745	78235899	8782571	6247549	10041824	47808009	17442444	100503528	8793885	86085410	10794833	36351061	11632566	6649632	6492532	4848625	20401745	82890533	58224092	12199987	21014475	2877386	5213429	12483578	14598700	18100507
17606526	7241295	3637977	153307730	9472625	92775435	8211012	5087821	9953779	46148308	9077277	44675063	4157195	65497279	9033067	24393926	7098199	6714510	4378742	3341518	12995585	53926775	45074191	8870863	17757076	2156922	5737647	9447815	11424217	17959073
19909544	6947862	3346199	121144227	8618125	68251374	7455002	3824012	10068654	43106195	7095142	31170622	3590005	98365074	9694203	19539524	8688385	6485913	5912264	2386828	11414259	41783590	50624966	7444225	14726519	2034742	3773223	9704141	7701349	15248767
24802207	7404184	4002819	115953596	8657300	50892173	8767965	5621910	9219000	45535681	8157885	23009965	4873602	63121686	12371416	29951300	11803693	6488983	4792760	3487659	11329831	45449923	53582462	9364047	16854252	2349232	3936806	10643848	8803693	19005805
23126478	6479313	3589347	122122980	10099167	68251725	7489618	7805880	7965275	39040852	9676393	26503060	5150032	64892978	12025786	32312185	7817456	6618871	6554128	2990188	12602065	52700345	39030909	9410557	18118320	2419050	4121189	9106061	7343083	16300282
20718128	8052541	3784298	129482748	7275996	42463550	6800787	5635908	8459268	45698045	10580470	27329910	4643753	51736774	11017710	39840819	7662661	5440469	6309826	3218292	11522107	47692359	42972453	7105192	17339702	2906771	3406320	9071470	12240565	15887292
15434117	5735207	4134831	103539945	6192530	59597103	7950355	6397373	7032492	43036739	12319899	25483537	3884049	49365712	14809112	26509082	10342578	6568115	6591888	2814531	11266480	34901187	42018669	11644321	18184750	3693820	4042982	14046093	10199049	19379368
17952139	6092814	4378219	124117322	6642871	64701669	6617480	5006507	11193914	41625700	8097016	27187809	5775929	44434666	12053488	21659630	5838016	7439150	7172414	2672373	17026009	78013238	38524564	8954195	20211775	3324890	3527374	11175981	5778156	16888713
11483914	3169424	3202670	107270690	4512258	49541925	5796656	3806728	8529610	30224480	9596411	20623425	3277507	67159665	16386011	24747257	4367247	4548633	5443289	1987187	10492881	50253423	27857878	7973390	17248540	2150816	2907328	7431753	5315449	11949030
18604707	4981204	4708759	106196825	6644789	56629853	8182738	6062939	10978133	53172275	8637328	27370307	9123971	59527791	16460352	28745849	12874324	10136856	7163383	3181485	14796418	60195747	55313774	10613528	23675045	4210733	4750143	10890785	8890764	23630402
21049925	8085058	5259475	176275844	10601778	61879899	8196345	6424559	12633194	65017096	10482935	19317417	5134779	56005855	11004473	38631500	8141513	7441773	5700069	3456156	11304343	74036067	46161084	9579488	22152023	3871389	6964806	14501921	11182407	19550113
19689401	6676638	3606253	198047401	9128281	62670801	8129197	6658937	13421396	40263315	11346620	16660259	3854020	53448010	9582863	45965184	9935122	7134449	4767079	2745980	10578644	51487478	31550965	8540337	17434568	2864633	4391102	12699773	14784937	18152513
17796672	5472240	4239243	115590506	9509019	74831635	7692295	6056437	15135904	49109727	8840230	15963754	5230500	53939362	10364871	31836591	7964023	6468910	5752090	3108261	9885427	60695662	35939924	8579035	21808571	2588877	5073591	12067504	13287682	17281175
16494462	6652014	3310389	213322371	8094695	58206428	6999861	5646893	9193310	60519673	7485309	15422032	3619681	49695004	8398648	40916712	11766296	5222641	6153961	2964441	9651627	54808170	27633193	7668751	17966719	2816054	5468088	14035926	11267992	15965865
21522044	5508069	3390458	160187015	6790018	107858919	6844704	6112174	8684337	52969908	9361910	16969399	4189497	60304352	10451782	36341488	10658363	5766925	7257348	3051248	10051010	41112361	34676701	8907941	16017783	2492654	3337985	12344576	9914965	16216119
21043588	7859840	3772083	159340077	9762395	100233624	6936177	5581774	8482934	52214245	9432401	16012405	3850732	49513338	10020253	38891003	6618230	5876406	7867550	3469872	12067380	42205106	42034511	11292048	20884431	3064642	3134448	19441839	11660582	23569825
16703701	6992408	2960724	129493119	6169738	67581465	5734854	5665633	9642201	39392388	6934082	11579022	4288784	36986514	14054443	30082705	6567525	6556164	4540121	2493278	13595358	42880412	34423299	10219497	16702243	2738190	3887192	13958680	11340718	17665047
19192708	6814087	5140512	210771191	9609791	78243257	9113844	5179955	13096634	55832718	12392861	14320633	4686370	53237885	9313229	48546657	7942725	7001580	5466196	2765139	11907866	49324477	57450617	10514650	23682838	6980162	4282179	12514910	14587904	18968762
19396151	5723853	4087214	186029120	9767336	63584744	7999223	4527447	9253324	42453683	11743281	21740193	5099508	43551101	8146197	31768057	5932081	9540791	4375938	2543230	7982059	47573113	44434544	8873006	23346815	3284489	3385450	11569818	12545141	17854147
17341065	6280227	4775610	172982700	8482333	91531594	7354452	9001361	10074555	49360892	17534703	20123539	7050074	51996517	11389026	32105573	7587060	7022458	5246296	2839046	12618806	42899516	39212289	7240069	20066411	3558925	4021456	14247601	8797397	16443584
26211944	8333190	6531919	213335704	8148034	92319440	9665555	7441559	10716183	58468429	14608938	24950993	5225895	48561373	12623799	37337308	10936213	8189109	5353643	3407667	12150083	49408578	42476245	11790281	24252273	4284946	3542653	13960190	15325424	21714147
24215696	9019418	4446439	200042618	8889188	73020369	7786251	6181496	11809852	55090170	14084822	28169352	4861065	53638980	11684461	50318659	8212044	7769691	5259294	2995789	10125635	57188325	41356789	8895111	18919937	3136513	4922327	10528125	11744036	19039219
24087405	8348686	5539277	116744494	8316543	80905385	12037162	8875437	12659336	56592073	18325380	39362235	7153183	96516452	14358445	32023779	11973706	10670573	7280003	3764214	15056912	83350584	61892359	10062371	27914750	6382710	6203005	19279698	20584452	25468103
12153062	4944615	3810025	88350087	7485576	54005139	6427237	4557302	8746194	38902699	7866674	16631512	3956099	37358359	9309228	21567923	6981068	5545811	4792721	2026665	10782597	54341245	34708504	5911638	17484158	3732628	3581084	11910089	15198471	15836870
18325096	5373345	5494429	109263913	9639076	85425403	8499607	6307283	7814947	58786490	14805179	16958726	5387585	55384725	9811446	34243564	5254657	7132449	5818276	2438432	8601066	49710644	47035529	11024358	36025491	3581623	4387500	18676471	10891957	17897226
16118533	7046133	7239020	102455276	7452593	48397554	6595974	5236181	8548219	48091102	9907521	12834494	3962954	37682828	7993046	27317060	4936417	7857410	4547310	2676777	7700620	44288805	30528901	9115241	17849149	3891218	3395979	11462266	10588002	18613077
27072235	7320401	8039770	180513019	10644733	63971914	13058946	6742772	11874353	69349706	17098952	19498800	5271471	54192471	16234706	48315022	11113327	13233955	6677353	3804334	19474868	59470860	83722888	11694870	24502096	5296065	5001208	20406808	18156615	30036222
25745161	10193222	6088445	121972868	8496781	177843946	8032398	11953668	13425391	80826185	15738494	36850510	4405237	124380313	13186164	36142132	11485045	16036889	6467661	4179820	16598835	101370757	63246628	15278579	20181672	4457916	4409446	19918696	20767405	36292946
13411165	5625860	4028127	202720580	5618030	76909205	7130268	5776539	8259448	46443630	8425621	15242656	4446954	45183647	7204390	30635435	9548353	7388793	4528862	2783795	10854038	92039027	34319640	6705487	18753499	3293431	3187655	12533541	10167020	20609072
15058231	5472112	3837837	112522969	7885713	52425308	6114094	5317894	11912695	38701167	17004131	14237592	4850127	36515757	7724523	41555547	11392009	6466169	8545115	2729913	9989086	81029893	41024224	8551446	17215767	2762927	4324190	12964480	10987675	18421885
17486835	9856347	3913885	301586949	8642137	47459522	7637685	5695535	9615125	38789987	12298277	13512663	3817296	31657959	9227070	44782065	8743226	8517655	7180914	3071694	12806107	66051778	46670110	11386119	19974458	3988644	4216633	10322783	8866763	18900370
22206366	7579002	4245292	256117947	10599522	52615064	7697643	6280306	10049750	45042225	11945125	27377401	5105262	53931799	9747137	28000619	8871578	7797254	4968030	4201764	12751186	52535778	46349388	11808847	40634462	3600883	4599501	26073809	9984462	19945673
18559314	6348426	3647775	137466688	9153712	65131139	6579693	5595265	9245223	55869459	9777851	14854725	5181660	35838298	9216896	32136736	5831351	8243412	5829700	4659666	9881855	52906301	30753354	9700704	20053539	3637130	4484683	14943294	9480095	18050089
19501767	5406824	3130276	110348067	6881263	44425873	7392171	4546560	9446132	41906774	9938882	16409495	4586423	33358335	9773502	23808434	9661038	7400592	5093011	3064172	8986343	37806927	31282189	9243300	20887633	3011970	4047028	12548790	9212468	18859857
18886261	5916957	3754581	144028718	6923571	43204200	6187000	8543698	11425234	31528753	7028810	16397483	5846567	43269817	7096932	23802456	9063103	5737607	5803201	3681453	10785625	48745878	28101522	9311331	18018520	2750642	4306596	14907968	8063329	15039248
26142622	5951620	4976837	113918408	7403928	70178434	7878111	6310900	10227674	44971134	9850185	16037454	5905650	53112166	8415172	28551878	11192583	6212007	6072268	3312074	12214161	51948768	92854893	8973694	21992891	2883342	6313675	15408026	12820247	18379224
19386366	5228020	4051169	129561774	8297395	50356562	6334821	5662248	11795083	54654995	9823384	15076357	4400429	35839028	7866185	20680965	9296711	6335761	5200080	3014844	15030863	58329324	41862418	9227754	18641740	2982509	4521915	12435980	9133480	18336485
43025772	5342323	4379012	145278230	7568951	44414553	6975374	5157381	9785424	46554165	8283717	18264879	4766847	34661075	8918964	38323856	7001521	7076129	5288459	4510190	10249840	44000473	46992420	9206933	19328558	3544706	4907607	11498889	7548369	20716910
34193883	6905631	5772914	145102837	7892883	88248787	9158404	4842969	11310911	47149600	8931467	15174099	5036755	51048294	10528700	33798060	7075933	6671674	5498451	4578217	11842402	47320539	42649282	11583612	21554622	3012128	5023786	14325786	9485677	22639654
22673917	6655461	4707779	164645292	6819673	47719821	6871460	4301152	12361567	57142082	10553544	11064935	4074888	43268529	9031662	34014010	6319372	7343919	6545202	2816056	13502101	40867836	42135282	9154137	15749608	2944522	3733404	11455340	10153328	19017787
21702352	6636828	5691396	148420950	7384547	50144777	7279941	6677130	13293998	43746829	10861091	15440220	4613459	47573415	9637632	65329413	9833077	7505566	6764969	5397030	15330981	46385016	35234451	13269338	21716634	3301363	3146633	12757075	15522104	19414900
20405637	6401054	4058557	183345979	6661952	54799762	10161078	6520033	18307475	50533642	9923611	15167009	5348242	49957811	10245582	46550445	12177874	8746488	5893698	3924023	14603943	49133441	47712416	20589632	32968291	2949318	4151133	12761516	10188564	22711320
22663720	5099474	7294977	226845542	6880530	45264016	6950984	4272170	11309503	39558716	6908269	15328264	8871553	45190753	10361252	47603759	8494158	7396341	5408013	2951603	10626606	44506711	34774143	13343698	21970782	4288402	3687653	10904514	8219328	17343453
23362835	8133188	7434251	322365289	6675710	58284252	6987565	4693336	7987498	45677378	9689358	15971047	13247667	55687876	13677305	34841394	9586599	18707697	4672192	4756841	11335706	86724337	34651858	8393737	21421073	3555511	5006640	15761514	8585656	16425169
18783406	7107490	8025905	249722340	5757177	60143139	5044912	3352768	6126364	48561929	11320698	15009028	5902762	57092249	8912529	31245713	8300149	7916910	4114019	2807906	8328298	49779512	35376100	13092822	19848101	3026644	6249134	11981914	8857842	12809387
18849285	10793781	4302317	238432999	9332371	93206779	8320571	5385759	13469738	67139622	12429602	18118160	4959316	80127686	11398105	45553005	11803490	11042717	6108584	3540382	11394940	81689436	44447439	8565356	37931087	5150152	4947357	17643574	10614897	21364632
11832469	6066154	2921542	138342672	25766956	48363146	5415613	3891202	7723550	82132372	8011606	16045861	4517396	45083197	7721053	19969117	5697518	6663215	11409869	2846219	7582240	76373935	25824337	6047279	27528365	3543499	3645130	30319488	6802420	13153377
13298872	3730307	3990748	130511197	8663049	33871793	6284764	5747092	6840835	43821573	8622342	19147579	4988243	40714046	10252263	22526138	6458318	6577689	5346156	3438565	12092512	108485690	31476206	8801509	21250485	5945343	3318994	14791847	8177526	14016367
14942217	3911414	7069240	121076051	7157079	40143494	4864947	5001808	9292920	68359685	9886655	14617510	4356191	45574860	10008434	24354227	8275858	5915312	4730021	11432025	9551253	74639518	38722857	8715105	17826418	3243292	4618136	11911744	10931594	16226765
22742780	5804385	9807418	151420276	10685464	80756455	7412744	8882018	10736513	78135508	12291840	18945760	5806806	59204041	12812048	32363751	9315927	9338883	6668212	6658356	14293323	71490104	40348676	11165554	27016576	4410318	6100186	18946787	12200032	19823186
19628883	4037921	5448701	113531087	9442205	79451264	6655777	8244302	11028335	48664684	13821567	14704565	4478779	36742373	9920365	23370601	6964973	7635311	4864218	4285864	13839425	83764601	58845709	7535697	49624776	3110522	4663414	16351684	8908569	24557460
22239039	6893877	5964349	187868189	12286178	66849657	9698897	10068314	16049907	70157768	12101742	20455979	6666664	51895813	16830733	37795380	8084939	10277458	5707994	4888184	19288522	104344900	69480194	10379281	27493178	4674885	4873259	16671310	13199211	26607251
22907031	4934652	5558320	159484227	12868372	60643047	9309739	6953365	11500286	69099891	14038720	15744909	5843744	51663650	15843597	34041209	8036189	8827235	4400495	5997900	25501897	61844118	54879998	10103932	28477873	4591165	4448648	20647882	10688178	22867829
23313151	7069892	7052260	173798098	12057588	56226567	10405602	10294166	13652266	96866590	18396770	16069692	5770372	56972063	17118226	43940817	11035831	9069124	5613037	6407146	26298510	63878138	103822529	9608961	29207997	4634026	6724473	23407732	15242812	28410029
30911604	6956157	6750274	175586754	16918389	70377178	12027339	10132326	11804474	86166314	14224669	21103128	6722529	67640222	17660238	41622081	10799058	14043245	7635014	6276942	22056272	64581617	65063837	13108196	27520567	5000343	7421359	19426782	21455327	28373118
50754603	13242857	10708904	305173085	18653728	92180660	20542577	15563987	19369655	128102106	18946049	25201752	11022489	86736524	23485634	59935577	60754931	16163830	10709308	9061589	26185264	92953265	76276911	17790944	44382725	9079716	9822082	31007899	26068806	42631899
50822171	18172858	11643581	546634721	22800291	122383168	17596348	17664885	22783550	124289157	36483949	31567099	11872201	101785411	24037803	85509768	32605191	21958237	12502673	8453183	30508206	112072491	86448499	23699260	53782196	10503915	10411251	35815514	27299058	47167644
59663892	21466575	13562449	681809025	21297273	125308483	23080288	19377314	25923953	173623921	38047234	33822593	15805887	137489430	32422498	107644344	31335051	25048476	14507028	11496489	38146266	134252046	121092340	30994854	71996526	9929292	12141285	55010604	33044896	58861212
41573364	21213571	14124173	495826574	20477931	144549783	21013982	21633235	31840140	198446667	26132775	32971054	12517823	116625080	36288132	78983431	28544813	21564416	15365326	12008334	37142909	126277064	116474618	31877486	76609033	9128823	11738580	44825065	23989250	61752451
37282468	16767434	13550720	493791652	15333190	146321170	18082131	18151124	87057786	134846331	23458446	27708811	13994800	95407646	32689489	83975024	23875305	19137453	13494226	9377395	33587036	127802578	101726431	23364837	61992020	11452401	10406452	33754840	27003744	47761908
40365425	13960632	15539208	343910324	14160027	286910502	30718385	14403197	36394916	131805735	20127790	26863179	9176078	75330687	33514398	69582835	22893801	19203363	11112021	7142235	29832804	90696453	82851616	18714293	52648308	8143541	8844708	29299569	21599483	50330535
36111897	9957108	10083494	298904846	11462883	95551492	13364090	8912082	24426999	74807180	18737019	23720550	5186931	54183989	42325937	44079199	14456646	10155116	6531111	5718059	19721961	64790984	57413137	13520680	42590055	4776112	9452002	21382450	15160419	31128942
19793072	7283700	6933515	268255062	10462036	65123531	11858859	8708557	17846016	65279844	15901304	17292122	7645358	46280588	39362078	34828397	10505497	11540749	6470320	4157195	18435777	56526288	51021386	12117222	26191220	3871174	7183174	13781158	14831775	23388843
20563538	8114614	6841309	275868001	10817705	58988873	9842880	10628696	18558743	59321650	28972503	18158598	5585496	44764313	13142070	42271263	12692881	10707320	5627540	5078274	16167302	54256423	42775164	9420937	21907124	4828902	6011577	13604948	25595439	26341429
19166768	7766045	6263385	159268941	10621095	54512314	8594720	7031039	12740972	50792324	16302365	24471942	5130685	51303656	11847002	30130113	11354924	11587811	5407416	5429400	14018228	50923182	44931389	7973240	25682997	2389514	4725795	15559304	15513309	18269356
35234958	14953136	8108722	335130836	16796846	104618660	15084570	13566666	23736190	118445787	18499341	95940499	15082740	92200459	23376707	57133301	15868136	19785699	11373484	8546227	23102690	105715009	73897805	17846142	45848463	5967147	9625500	28170904	25047837	35458747
29653861	12829387	9229886	289112482	13743146	90583615	13452849	9598733	19006681	79705761	15469076	129071934	14071936	79148323	19395030	52962310	15545045	15239016	11686722	6151853	20726552	77401994	56395154	16297690	38018525	4677655	8686225	23215335	23035650	34936465
27986668	7938654	6863980	398484557	9456677	68732177	10073611	7760915	15002010	69426097	12727487	61128319	7252210	48903980	13690366	50968369	9807765	9828099	7088410	4434716	19044824	54716037	40907652	12676552	35884664	3396720	5951881	15378923	13771554	27197001
26018681	9316216	6527634	563267308	11698994	57776162	12302317	8319382	30417595	70120402	12545367	34141895	6924129	54212139	14879474	55809235	11476282	11975865	6619628	5819100	22731123	59671022	52475810	15222401	29673265	6418513	6588931	24038390	17169992	38061099
24319311	8588968	4852803	602329063	10139486	59278350	7642452	7056393	12597241	65392562	19880939	28907424	6427040	53519349	14523841	41961806	8550568	9737705	8175181	5176759	13421107	45329096	41677483	8420215	25048239	5092036	5115577	16131094	11395740	22754410
24603823	10955743	6441765	859371195	8211183	54361917	9821659	9096622	10804802	67820988	15471761	25556511	6759181	51592452	13142648	55386467	9092833	12659916	8674667	6605758	16081229	48188620	51427245	15062968	23793139	12813048	7486064	13932051	10975022	30923566
21455506	7169475	6200755	423860822	9458049	49952054	9216683	7698682	11247080	62369480	18413675	22842458	6438785	53820750	14150547	35114687	9229592	9924781	5958506	5389981	18451340	71959000	46091508	10374234	22739750	11151942	5284701	14955768	10460355	26975034
15593970	9207942	4303537	363233608	7644692	39176233	9724937	5722660	8397428	47763362	14713670	23075259	5294197	40645806	12867872	27944558	7700234	8830205	6261989	3466934	11546788	38852647	46862037	9147913	23318118	11147361	4063864	13380762	8476902	18967495
23906566	7460397	6984739	297055982	9855609	51032084	9202440	8498527	14060037	48557556	16123358	23413098	4478285	39100762	11182942	28822706	8939083	15840693	6311784	3734193	12799634	57340517	44134208	9182005	22641717	4167907	5516470	13111081	13484133	22437374
31058903	7974714	6807902	282193702	12664832	50688156	11241953	7473793	12281920	62876049	17507620	22639922	6074129	55290198	14555278	30051300	11402324	11161308	9169302	4737646	14397757	59301724	44349093	8972529	112995522	4772161	5093929	28924585	13230132	29190815
19995955	10278327	6169646	243414633	10693550	73754351	10121366	7036931	10224139	61217614	15358106	16366658	5463880	40774138	11141017	36862924	9704401	11764927	5475595	4535312	12565855	60511288	39714618	8871420	37672216	4708985	5046669	19053479	12493088	23394181
17958934	8755573	4735530	305898379	11951079	55491617	8978196	6994807	9145636	61747474	12278395	18738565	4979011	42806570	13713677	41671129	8571787	8765529	5250780	4391281	13373610	43895365	35057081	8817258	26461618	4410018	4838630	13663063	10809445	21071830
23966669	8361135	6478737	282949623	8648714	62390401	10276728	8693407	12845099	97474176	12043696	28157457	5761373	44255375	15848203	57071380	10705383	12892257	7199686	5271141	17460462	54930586	48739897	11458185	33497534	4837769	4743243	14430512	17114532	25416357
16643164	7805625	5533036	257073315	9322468	58506161	10572767	5831535	11470963	60237101	13319562	20451189	6798585	46089860	10768147	36144812	13528432	10652670	7067405	5216110	13946889	41960140	48291229	8883709	24531803	4903367	4620549	16111209	10407161	23112321
15723366	7798123	6867663	204195825	9938425	103786512	9605138	8660120	10673185	117907751	9915032	21509317	6027421	42988411	15551457	44809627	14626919	12433716	7329997	4722129	33378110	65813212	37388534	11124240	21921226	3483127	5346403	11716041	11602411	22435475
24978056	11081182	5415696	255668399	11674094	78993779	13346609	10135382	17509276	144435576	11734530	36900655	6743810	61407865	17008157	67190368	13032201	16446548	18444872	7423351	27728181	64531039	56866524	12286356	35973625	4557868	5301117	22931877	12027724	27969253
28986248	9717426	5520573	286741989	10851144	53939051	13616204	14747999	10439907	169776924	12102400	28231453	5247581	53322482	13448671	53379165	12112393	14572031	8272426	5848828	15122750	55044894	52565351	9867231	25557722	4924544	5015700	15458398	11229220	26206585
23014807	6061410	5283518	220451833	9802575	82624354	11453776	10777677	9792132	83282018	12607643	24348169	4723740	60225928	11595513	50138494	9473882	10711005	6598872	6469078	14659717	48794446	32022344	8329195	24052889	4190442	4234249	13903035	10770784	22826405
25408589	7407079	5782902	212862197	10625398	79439465	11325602	10073212	12593074	91323154	15407446	22527643	6980843	58350896	13429403	44442918	9167368	11125112	7669894	5402426	15647718	66740834	48226893	11547786	23103757	4380858	4894762	17407279	12508561	26043987
19890138	7058913	5263658	230212240	8298900	47650721	9241120	9678685	8466898	67333212	12017879	15820293	5464333	53243941	10625716	35848788	8533279	10593024	6755039	4222294	12763818	67808910	44349206	9161237	21805674	4261187	5391775	12213546	10999207	21860236
23722985	9312381	6927167	240457248	10489775	62296665	13862870	11657363	16655517	89202606	20791737	23419156	11049058	90745728	15688745	52686166	14710998	17310868	7594435	6027526	19567242	89685112	76696690	24691110	34264044	5878810	8955864	19766641	35684924	34653486
23668650	8114584	4837107	198969075	8940559	42149003	8523388	7968395	9979641	54146337	8805360	16879325	4757407	57735872	8571605	33156246	8857130	14285579	6477196	4552695	13332277	52319341	46339641	11028899	21653388	4255210	5316102	12189940	9029027	19822753
22874110	6045029	3431523	142638782	8999537	48834837	8660497	6683579	10117721	56237763	13980262	25847155	6209893	71495236	10874749	34086905	9361503	9156766	7942201	3914774	13765682	49208483	52085580	8215733	20647994	6444435	5783255	13682291	8421143	20419999
27471107	8661245	4519926	382283427	16463443	70825656	9267419	10759867	12618592	74385010	11896535	88380416	7043250	66809335	10042114	57425394	11457777	11765443	5779180	4957967	14619963	72744201	53879665	9649057	25856446	6019416	6967879	14145321	10474067	23812402
61120002	12460615	12055693	384412441	20950142	92158753	16686256	21663950	26238312	113688420	19984861	64303819	8195806	94237890	19456859	86288339	13359819	18170504	10785625	10108456	23408816	96283546	62445243	17381227	126003608	8178562	13122608	43131125	21320332	43223471
39770480	9061410	6239605	503233586	12105969	66106406	12228151	14706638	20944177	65517312	12993749	68887875	5586589	74136055	10983681	51724509	10821261	12142165	7614979	4583749	18906007	64768319	49947061	9122422	103805784	4492251	8762271	32850061	12702972	26583200
32237722	8518683	7032096	228267679	10017967	53205930	11900425	14735024	14200739	93903332	17334130	31926158	6745650	64848140	10562206	58671619	9705664	12004020	7515426	5033308	15487045	51054093	38844788	13364042	70599073	3979195	7967855	21606403	11360515	30345030
30925367	9141861	6410587	231522138	10816679	64907855	11080157	10415216	15724577	80394887	13172942	39529989	7639243	88215615	13118567	58241837	10829338	11124681	8043599	4875385	15236322	55622705	44488700	10732339	29439629	4967682	6842824	18013432	11492543	26691183
33854681	8672692	4695411	222383653	9380934	47968382	10338607	8128926	11414965	57436745	9723020	23821833	7732174	74783454	8964194	38725634	10046952	9516234	7028112	5932031	14808684	60736624	32941497	9053627	21646258	3734993	6377679	15708062	11460193	26026449
33811954	8372267	6094328	223945223	10263416	59526140	10104943	7540732	12114761	60698965	14233008	26828438	6944293	85510642	8923222	51015557	7931996	10686300	8145846	5633468	19306763	63409066	56400730	9798536	34165767	4147019	4717709	22175710	10344376	27714466
37630526	7877959	5467806	175343542	10542564	50460508	11919066	8314973	15137291	76366111	10917152	40140112	7851584	64475737	14557327	42430708	12893792	12514022	8777026	7185141	24235389	54082743	45308238	11361835	27788346	3758261	6900690	16555545	13621380	30920607
53885414	9185457	8290384	369126134	10784284	79204039	11384783	11851602	13899273	92692711	17929635	28502750	9042539	95770879	16891081	50988940	11764861	19235526	9185757	7619527	23820038	64592931	67777704	12323726	32148545	4242329	6068970	23205136	15500229	31004642
49914334	17891162	7840037	448011888	14733085	80835803	15398964	15398339	18953297	111970678	15065941	30969110	9175246	77902421	18191904	69796785	20456191	15414106	10652703	8689888	28732061	83483208	59309914	12836256	43344789	5362621	8645007	33842653	18697606	36457328
42476897	12080637	5825511	291615349	9674325	119794310	13057625	8499292	17824086	79541596	16324644	31037570	5851856	70935365	15405649	51116119	13360037	11518941	7730535	5466927	25274573	94053759	74483310	12023179	32228537	5625172	9774728	21730306	13604416	28242862
69698256	10198039	5565869	335954946	15809545	74773703	10169788	8400462	12659394	64949535	9052726	28481210	7180924	58483686	9595350	53214714	10060250	12602664	5861065	4835766	18601853	55112896	50682086	8691515	22166660	4374658	5793668	18231411	10021117	24871356
44883530	11193403	5580750	285503580	14024940	58374919	10534505	8070621	12070099	65570652	12809456	30191957	6842567	58431018	12361771	49325367	10070859	9428881	5509153	5291784	21872739	52745739	49327776	8901909	22389949	4120839	5210301	17205774	13912907	23574374
29573278	7566903	4598941	225225335	10303162	48920457	7491039	5280852	7887460	56159580	8757245	21718134	5785241	40140999	7103910	37316183	7004470	6177115	5136894	3855581	14960866	41815239	31563904	6649435	20807202	2998151	3411876	9746303	12188391	20456715
54985322	6349396	3192271	204355871	17855871	53682870	7613636	5330539	12891153	46003514	8010234	17651482	5330581	50606884	7628642	38168393	5839082	5580403	6868544	3320184	15584993	38826491	35426878	5705852	22122467	2324576	3633585	11135380	10215233	17862279
109812458	10596158	5136547	284551111	10424858	70257543	8868732	6797001	17363659	61755332	10671150	20651073	5338149	59908769	9375006	55447031	8164711	8774802	7847898	5663238	16351364	52489954	38532476	10206142	25899519	3965566	5096109	14557528	22097211	22240150
42548130	7283946	3154357	229889957	7953157	44235174	6507812	4517084	6837822	46134834	8943611	15492820	4399267	51289661	7781041	78833049	7154716	6454657	4991167	3726920	13603484	43830076	30565878	7305202	20039009	2943840	4754521	13716484	10501306	19540244
38190599	9613156	3839872	203504790	7354752	43860391	7365248	5329412	10694668	45142226	7650042	11979569	5368216	44895176	6679202	51904868	7960478	6753165	3702249	2840773	10786553	50949189	31633553	7485295	23799877	2507065	3160792	9253384	10705983	17871722
56616637	7611692	4873358	175396829	10196787	37620619	6576326	5602879	9989060	46870226	8838174	16737212	8779441	47934368	10799512	40867065	6773382	10116488	4321933	4359442	11454042	39449753	30463153	7164974	18491407	3201167	4009837	9836225	8974670	18836970
48115367	9095670	6168142	496661668	13574701	42784901	12166079	7074270	10980504	65455032	15042562	20584430	15729539	85199268	11705369	64383026	10094654	11825264	4863910	4167312	12925673	52491317	36003362	11797202	19931918	4891638	5005084	12259251	14070469	23878529
35329540	9099933	4849491	318422395	8734547	35833215	8651734	6746326	7478971	51901601	9948757	13776780	6708271	139946417	19964736	50120449	8062819	7694630	5681684	3864997	11915310	42880148	30775278	9099034	19726290	7931215	6425635	10285920	12985199	20910941
36623466	12223081	6291595	254912753	9446435	39740229	8712385	6193694	7319746	55084156	9481258	18703720	7514283	88684738	11562590	41658054	8171587	6661944	6973761	4087206	13569581	76266408	42019613	7728412	31382565	6868806	5022403	12357454	12645780	22228287
28661176	14151504	6253827	252481410	11481369	46178889	10886776	7603477	13707673	113727850	14116875	14972675	8055801	123276814	13175342	48437987	10737615	11573445	12081780	5125272	17960955	76608680	46716414	13027281	30228517	7400617	6050894	17613808	14498890	27845455
36684678	11165603	5190758	216900323	16382518	37798132	7911572	7995274	8837997	67046180	11163711	12633331	5891258	138275189	12552653	45696755	5931366	6804563	6653831	5428607	14308213	56895891	35888595	9818910	24211813	4644989	4198999	14718479	9279438	19861526
31769760	12728689	6529475	200787317	10712211	44041807	8452134	11299173	7812229	82363575	10883893	15098805	5373954	60939733	10324791	38679634	9273427	7114044	6467386	12651827	15689701	53548172	43487713	8919118	33711104	5459986	4191922	19837566	10104267	23434403
28891564	10908300	12700535	208066201	9747969	44776872	9959583	9116278	10407128	66593765	11159143	20334323	5387883	58240451	9932060	36357290	9004694	8020592	7046664	5788879	15297807	63023509	36724205	9401107	27995122	4729050	4966822	18897275	12724659	27173289
62646100	12098835	8606667	408881694	13930515	105723750	14396862	11894676	11320807	110517906	11773729	26262196	7057876	84543706	16451497	76480545	15828701	13352667	7009167	7414366	20693153	74514622	51462544	16774812	37748309	5039766	6135146	23383927	15326374	35502447
32568350	7379614	6102840	273021492	8699507	47737143	10341386	9529026	8477667	57771968	14076882	27476134	5009720	44888594	10390794	39891943	7822948	8653673	4942342	5251921	25658255	57712077	36422709	10656169	24333410	3593440	4123501	13471711	11292789	21753789
39141543	8020299	6879658	251872722	9274588	50715108	11457875	8957356	10152079	49901251	10287927	16620935	4709968	43109869	13720903	46434929	9503982	9499253	4546815	4022482	17383368	46794581	40507368	9438746	26338537	4195453	3710799	14592213	9480955	30618901
46132136	9820032	8962921	371659045	13545873	67817083	15217007	13693103	13364345	89785421	13088967	19229997	5883336	68000640	14754111	74053871	10533684	11847097	6507777	5773403	26790104	61186431	74683630	13466969	31569796	6068176	5860215	15846539	13790143	35844492
27842777	7349466	5783293	217013657	9306885	38987139	8393544	7604190	8538239	48162109	9894821	16351046	4136703	56691701	10136396	34335187	8237393	7269405	5421603	3559886	12578863	53534693	37958063	8783353	21760864	4061664	4736820	13522166	8920447	21772784
26684777	7776933	4897485	244103570	11159772	39655494	9276195	7648189	9276054	54881253	9028532	16106794	4953437	58296217	10465976	40087182	14216977	8681622	5245465	4337792	14824646	65836911	68243366	8532594	20787233	4292191	4407519	13818279	9575589	24481072
24984234	5287782	3457905	265942678	6819622	39818662	8403964	7063306	6431324	41645230	6245195	12634782	3237652	46468707	9725199	30863056	9785311	7588511	5612785	3771861	10728778	36549119	50872203	7758123	18405431	2991502	4131756	9053271	7006676	18193083
33679039	4457990	3624148	192286870	7285228	44478327	7821906	10423073	6943688	41220256	12574822	17890728	3531095	51139643	8784118	25928075	12348850	6257032	4646726	4311630	9586056	42575843	144330269	6559425	15008461	2383890	3446235	11946277	8520338	17998624
33126260	6586387	4827016	218899761	7316775	50424085	7761386	8290158	10710889	53905852	9872608	17413287	4331468	55969275	7989475	30193785	7523320	6031728	7195546	4230480	14334737	47824760	40105371	7421920	20837663	4332145	3756913	9919807	20105197	19024108
34118098	8046824	5753946	265302174	11213388	80003695	12062297	11167768	11913712	78630096	10918793	18653869	5495014	56868269	11072513	52995990	9121433	9121640	6666329	6393454	21459373	62950525	45784301	9701216	27177833	4911880	4682529	14473279	13947664	24129751
22921012	6265720	3854985	324687362	7323256	148078019	10025190	7953515	12164743	59276683	7287667	15048185	3881558	45508704	7597408	30431632	6952104	8100734	4189947	4646259	26443233	32516981	44096338	6143605	19872096	3389848	3664226	11409161	9409918	18669372
22652822	5314274	4398007	209958918	9818960	80556453	6352503	5616606	22390608	50218849	10187544	13163667	3665209	43829525	9086769	29989357	8418294	6441172	4425424	3645711	30384942	37903971	37742990	5731120	15112102	3243178	4573688	8823687	8397881	15134840
23057662	4319787	6366508	225290752	8586918	46651520	5531271	4470373	9631899	40154935	13918487	11363772	6045621	49411678	8276241	27586777	4833715	4714611	3232310	3168577	14147927	34188769	50450484	6832706	21931812	3466136	3149442	16871660	10553375	13589979
24613449	5465737	5112765	268112090	8761323	45566912	24333291	5525994	14226683	39776367	15281580	20089336	4585232	77388977	10726338	31264377	5188990	6108781	5577253	3602349	8922665	43875185	31810707	7673750	28675179	3493291	3775500	19531210	16006703	19477885
34636209	7570287	5352906	292090760	8120514	54563574	12581482	6611554	10809776	52935956	11800147	20176558	4617963	74247859	8398077	40751846	6956832	8890648	3915604	5097069	12843286	53254553	35394253	9227944	26547871	4733767	5749409	13345753	11781357	20377699
39344051	9222981	7125002	285722768	10085182	55371011	11795333	8056227	32561906	67461286	11376897	18326697	5840520	62118225	13924632	55127424	7221522	8733600	5435053	5077871	16576153	70976895	41843278	8525484	27503169	3952088	4923701	14470557	10223771	25967023
22327364	5316182	7055691	226951567	6066132	38219920	13674606	6107922	32200229	46846450	11816101	29276682	4441124	45688460	12659693	39032896	7735912	9344160	4791508	3928297	12595480	47626207	38778684	7623903	22080302	3169130	3442245	11795898	8982262	23105390
33285415	8207367	8102833	269368137	9853557	54358566	15021352	7131802	39966320	67273335	11602018	34483534	5145072	58579399	32806642	39658395	12548721	9294083	5869339	5439978	16499752	61882719	54205543	13254343	22281761	4409709	4692233	12218931	9932180	20204124
29202050	5975141	5001601	270339701	7493590	39705990	8940728	6196582	12502562	74922067	8236298	49898837	4179063	48476455	8681442	36460271	7629077	5893950	4695849	4171987	16980353	49202820	49277217	8322932	37396294	5010350	3819349	12043887	7497230	18920616
36038332	7219953	4272977	265083353	7644140	47639908	11665419	6452311	10763962	66932295	6710464	24496081	4801651	52698692	10362723	44470715	7267313	7044781	4556028	4149867	13736516	49099687	37023031	7488132	30226020	5180598	4713568	12921457	8260396	23332746
13048768	2747998	2122270	138425097	3078679	24466202	5257266	3036470	4991843	23163628	3616760	9018980	2232713	28346827	5838797	21423184	3364639	3786301	2452402	2093982	4906306	26164410	20994667	4734771	12036759	2186605	1892548	5519185	4258796	10254499
31461952	9049170	4621077	345319163	8340646	45996785	8403551	6186781	8656311	77623252	8060156	19858527	4524289	39756203	11677991	45283366	5972390	10659048	6101527	4923069	15561622	46769711	41128277	7673132	24221845	4043524	4026061	17774874	9288061	20150686
21155762	6688512	5317818	333397020	6054681	53297481	8845226	5383421	7655119	80405509	20794878	27205536	3661966	44193000	8923573	45098989	7402723	10828006	5648319	3853208	12142368	40917937	39700803	6441769	18177834	3400852	3739889	13962025	10817145	19768388
37656198	12252412	8601750	435995546	13077821	74535375	13373259	8120437	16538704	98614612	19654941	36175403	7836782	73450583	15032551	61406032	12589165	12650131	7683935	8720938	18442388	81352372	72850067	15034612	33436642	6878941	5320296	17503862	14845127	33953998
21701951	6533905	12018643	315290493	7492386	41442704	7007137	4871674	10350940	58197224	9622578	22168950	4862418	51819119	9852657	33180188	11230072	7714461	4860256	3867054	12563660	48545038	42808892	9387537	21837635	5264901	2736205	12275036	8787232	17260722
25691736	7007332	7252534	282918746	7899098	46253609	6638101	4575994	10202404	68437603	17909554	20453880	4962414	41486425	15792806	90518883	9674411	10585173	4024126	5577944	14485533	52294145	42683432	9952538	22166210	5609898	4727672	14104241	11199004	19461442
32967984	6106525	8133628	293656217	7485298	43528470	6122255	7092631	9974773	61578307	13964389	18506520	5699392	42525993	15294467	52211083	7606619	8977673	5906891	5910639	17207283	56817567	48287630	9820197	21861892	4848954	4516768	13421135	10515168	18295582
21311683	5531541	4624291	254623356	6443276	29137323	7445434	5107098	6576462	82989964	12500804	17254816	4144953	49516505	10417771	38784022	8309533	8365571	5347874	6012213	13893685	46149794	52802732	8315339	17020689	7733032	3550007	13706047	11401556	20122651
21011916	6522932	6455898	244561448	8146465	54877056	10324948	5120074	9543749	65325851	12198143	17918952	5082928	54793358	11505958	44719713	8529505	8417800	5139300	4306040	20851140	62669835	47837577	11144635	40801577	6514989	5181725	12145965	15754543	19645817
30059308	6940388	6034925	285841119	7844327	47300630	7724058	6157376	9881872	79715048	12008670	21688006	4369089	57972001	9567644	47785655	7631855	8059234	8123408	3982479	42406060	60519485	36040646	8352542	22568159	6619736	4294075	13915817	10350356	18443634
22461927	7020049	5545848	293430741	7139120	44022673	6624080	21885349	7323389	85731087	10310979	19312726	4848770	44072943	8835744	39106916	7018614	9149209	5721148	4075475	40329198	53788975	43494475	7648019	24358600	5526499	3951387	12403834	10058857	21843084
21376189	5167869	5465587	191614765	6326915	44118525	7596268	8460523	10050878	179399804	11078293	19599240	3796697	94837335	10808678	35979769	5789899	6690046	5805729	3337963	12611813	38935067	40241886	8793406	25797566	4411440	4844662	12290172	10037087	17848110
25372111	7377075	7557902	226912953	8465275	47994851	8990956	10582320	12709202	73837400	11351568	18240743	5009375	78516738	14218079	49483071	6918282	7140889	6864203	3978387	18320006	54576189	69242179	11132264	21896870	4828653	5396223	11854703	10975528	21870367
43896056	6965628	6000426	226603615	13567989	59675144	15514910	8315992	10664012	89095068	12084961	22319978	5057943	56394300	9802321	41293078	7480571	7881008	6347444	4202932	22542285	47926736	56842129	10326605	22679051	4366557	5175915	11897483	8984117	23935045
45152622	7172831	4076632	195958781	7646122	39787425	9667229	5909297	9876150	61437804	10789277	17911286	4474774	38692666	9656687	33455291	6424737	6737040	5563507	3246908	31904151	46214387	56695477	9654733	25850088	4527727	3805115	10770783	8559381	17961238
41202991	11978247	8856028	226882451	11560227	94963756	14709715	9274170	20352075	96490922	20214355	33110865	11849637	94567471	19214256	52597423	14251306	11978519	8868057	6492582	26492823	101408082	68936059	18292320	44931649	7388890	11673041	19879308	14934968	33465752
25731804	5270921	3572596	343933554	7921128	39706135	5977707	6089232	11436801	66300299	8910440	16843322	5039846	42250067	9024818	47384977	7449598	5887646	5169371	3485368	16506783	52252784	42541949	8172244	19010551	4032599	4295859	14517135	7235400	16048657
35417790	7589400	5408685	239057137	7844413	44833110	7278641	6994860	10126394	61467237	20396150	14771402	4741225	46309808	12247653	49091603	8357447	7965474	5981331	4660198	20442464	60751395	60478942	9797084	33607427	3908157	4777979	20106644	11067312	21163634
26270916	6236355	5471785	203554377	7177717	57676416	8156507	4888522	8228438	80285990	12073881	19700673	9284170	45222394	8518210	30898792	12053103	9365201	5414459	3611754	13158461	64132690	44891345	9479203	27610368	2945426	6170731	15032897	8574408	19160239
32466179	5871963	5849305	302787329	4767611	37600399	7484667	4800578	8067592	95627180	9879976	12945176	5052410	32002386	7428114	35543335	8643618	7793474	4752519	3164166	11537493	35791335	37286252	7666229	30347739	3069084	5789150	9977323	7901633	19842581
18568340	3125515	3579173	190542443	3369016	23345382	3779399	2827823	6788664	47084282	4353611	10605594	3052591	24833260	6503411	21960367	4738953	4627585	3516741	2042102	9550025	23195776	29299119	5209768	18132922	1861953	2275109	13237540	6190571	10245784
18683514	2660722	2536693	158303527	3218113	22935287	4136174	2832716	5189467	42247578	4763205	11949128	2775114	24136135	4995176	16895190	4951166	5049963	3052093	1722580	7564262	21287332	19180079	5604668	16465374	1776695	2536425	7743707	4866341	10147453
26160693	3830028	2568121	145937347	5249683	26741362	5308257	3479471	4634287	39263916	5136580	10469037	2872688	23703758	5943822	19242924	4320235	4104938	3111557	2613284	7275186	29823501	26010668	4151911	16708933	1720201	2546835	6862213	5241781	12771345
17951166	2898496	2749261	167931523	3572668	17640913	4468587	3255047	5022966	43269038	6297722	9159794	2941590	22319235	5702392	19792816	4104653	4366999	3986955	1935126	6860564	22616883	19676377	4425852	17747515	1579099	2500073	8400601	6332105	10865943
18555403	3332968	2811743	176266499	3279845	20778390	5010355	3360360	4776071	31407119	4773743	11494975	3530904	21709431	4959865	18197560	4407160	3931307	2959942	1706821	7860342	27396333	24693279	4062913	15689777	1637998	2427796	10112712	4665252	9769365
